# Supplementary material for: Phosphorylation of multiple proteins involved in ciliogenesis by Tau Tubulin kinase 2
Source: PubMed Central journal article supplement — Mol Biol Cell. 2020 May 1;31(10):1032–46. doi: 10.1091/mbc.E19-06-0334 (PMC7346730; doi:10.1091/mbc.e19-06-0334), 2020-05-01
Supplement: mbc-31-1032-s001.pdf [file mbc-31-1032-s001.pdf]

# Supplemental Materials

*Molecular Biology of the Cell*

Bernatik et al.

# Supplementary figure 1

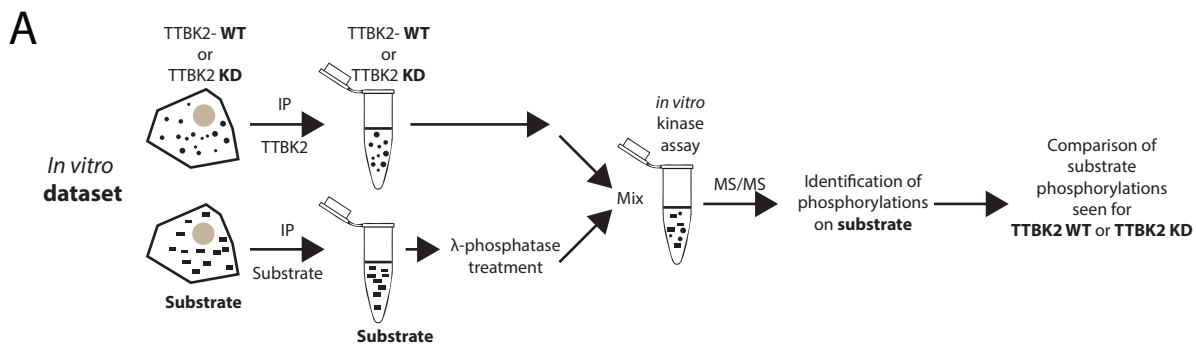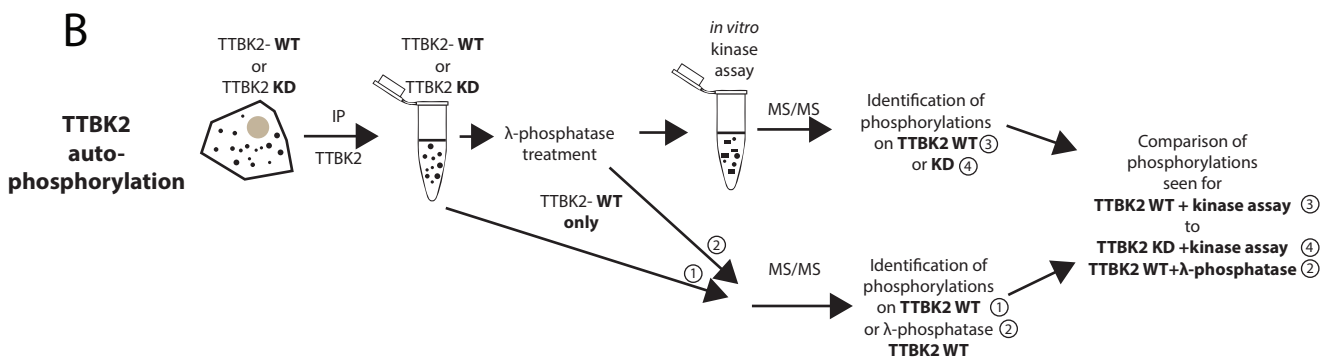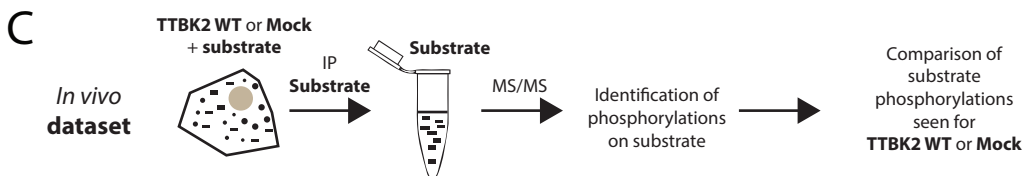

# Supplementary figure 2

**A**

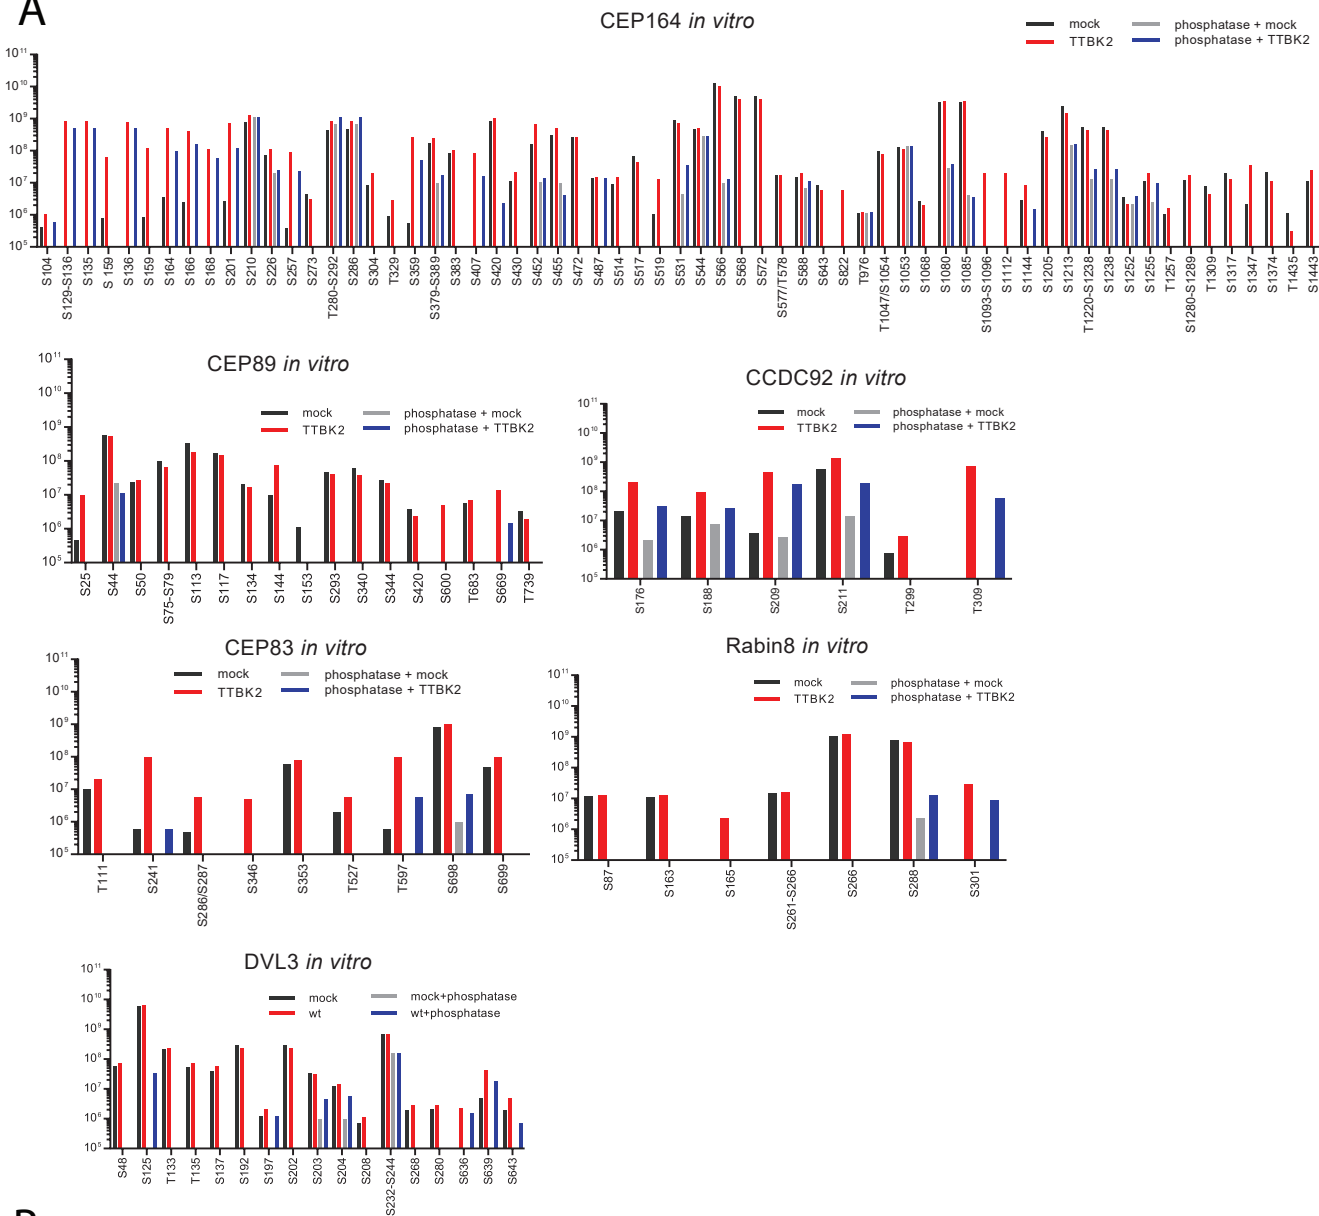

**B**

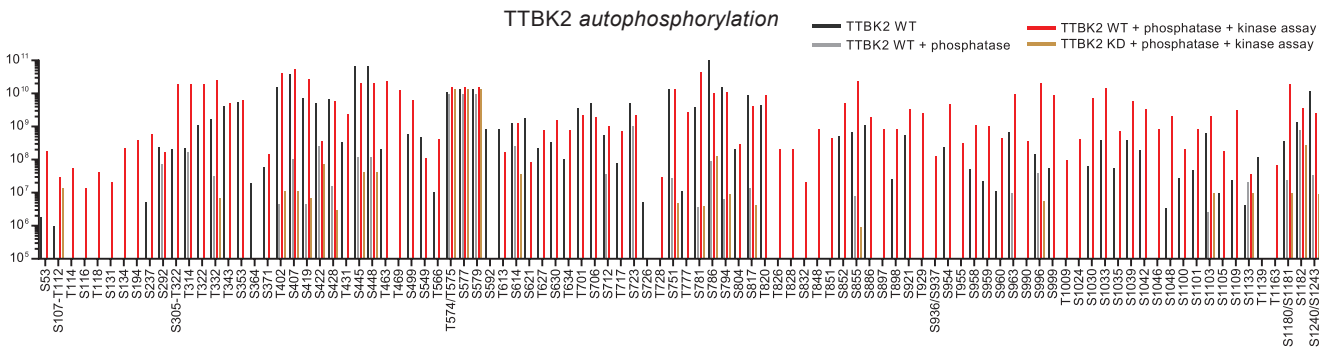

# Supplementary figure 3

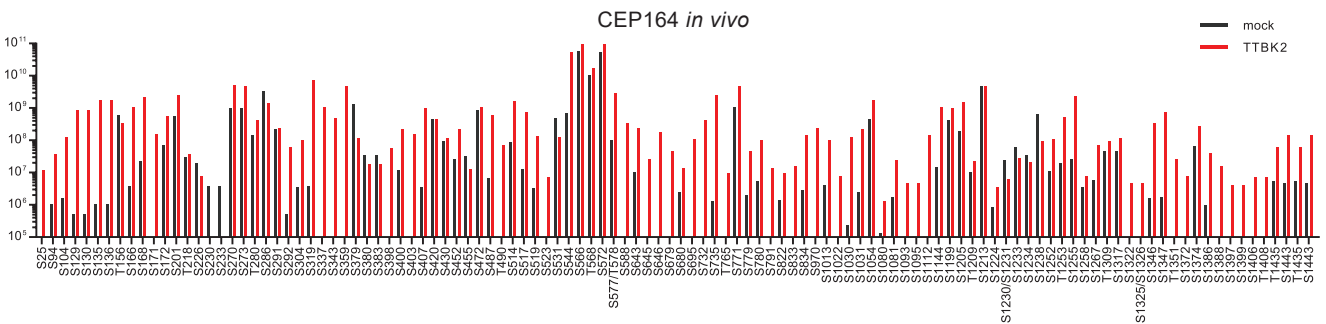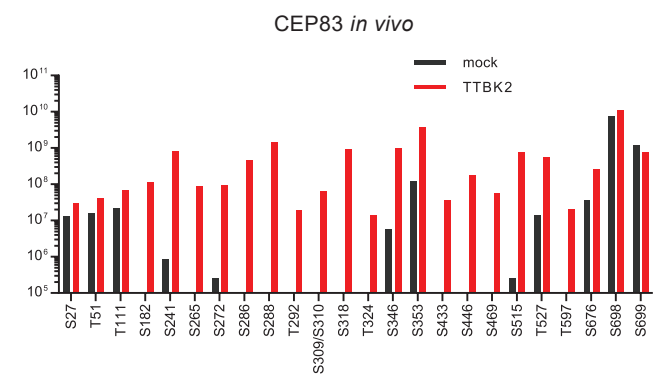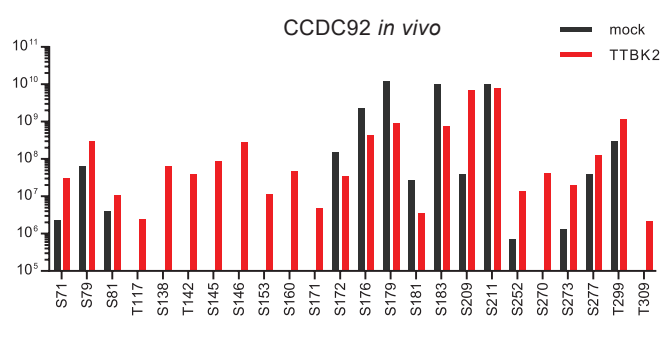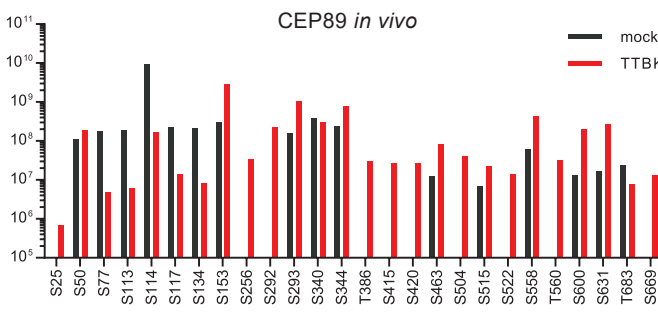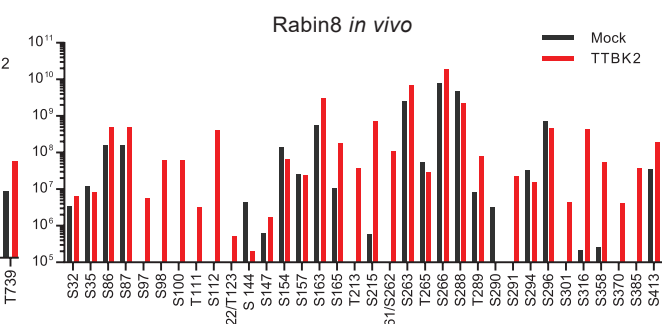

# Supplementary figure 4

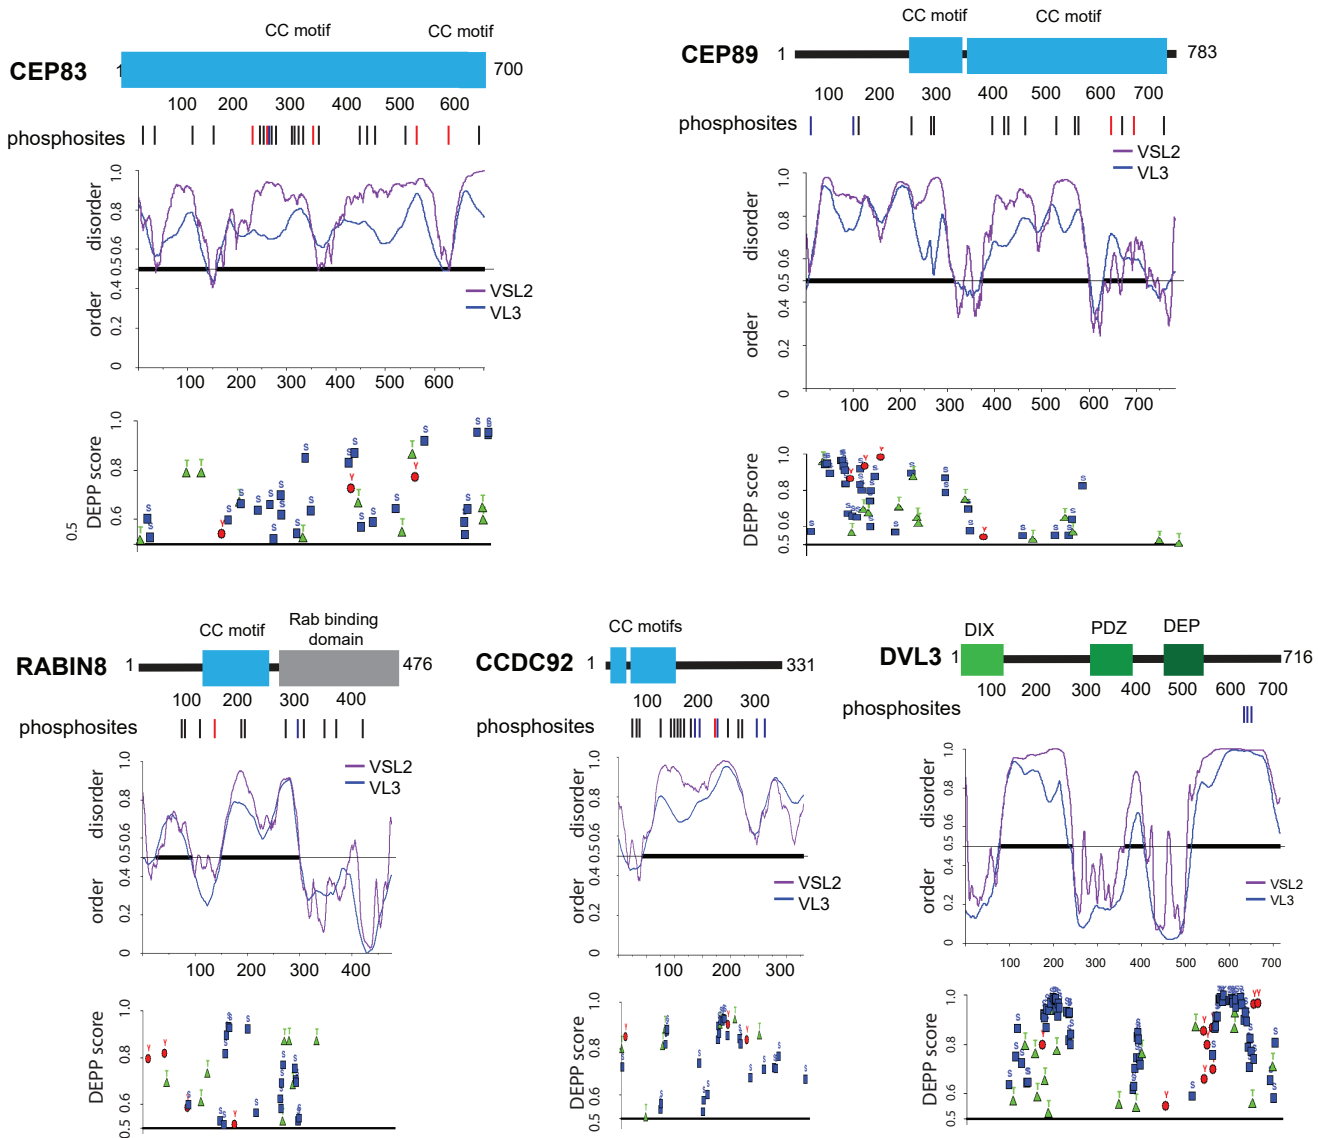

# Supplementary figure 5

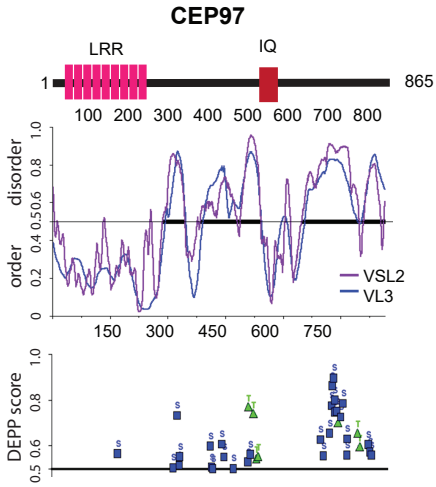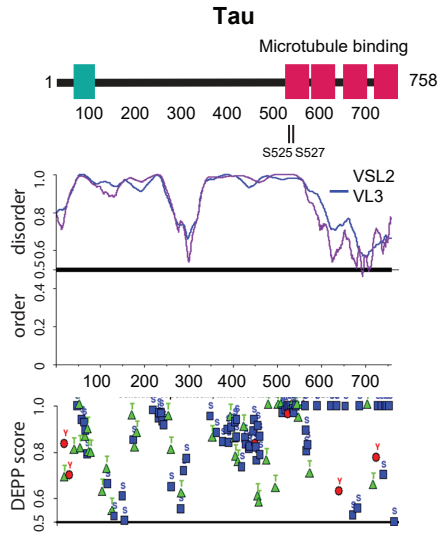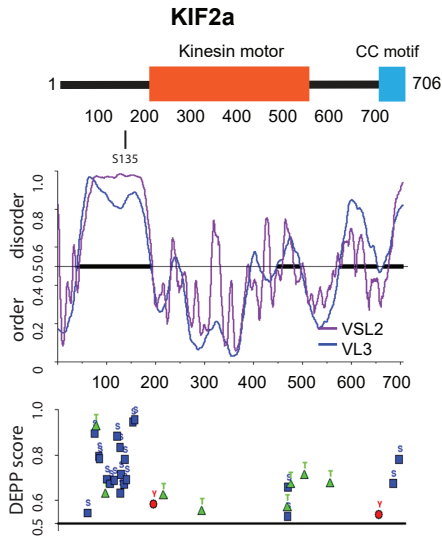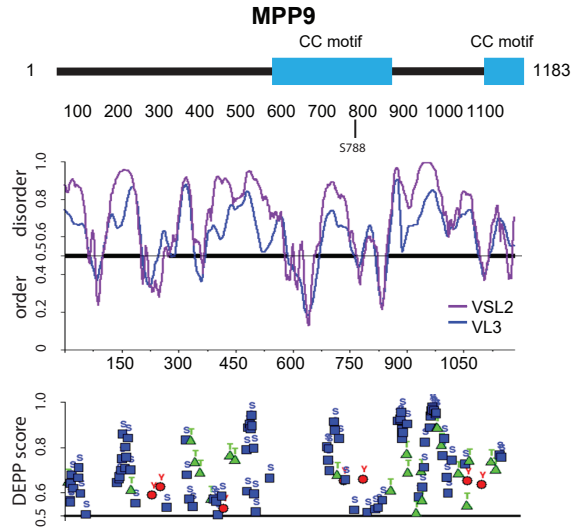

# Supplementary figure 6

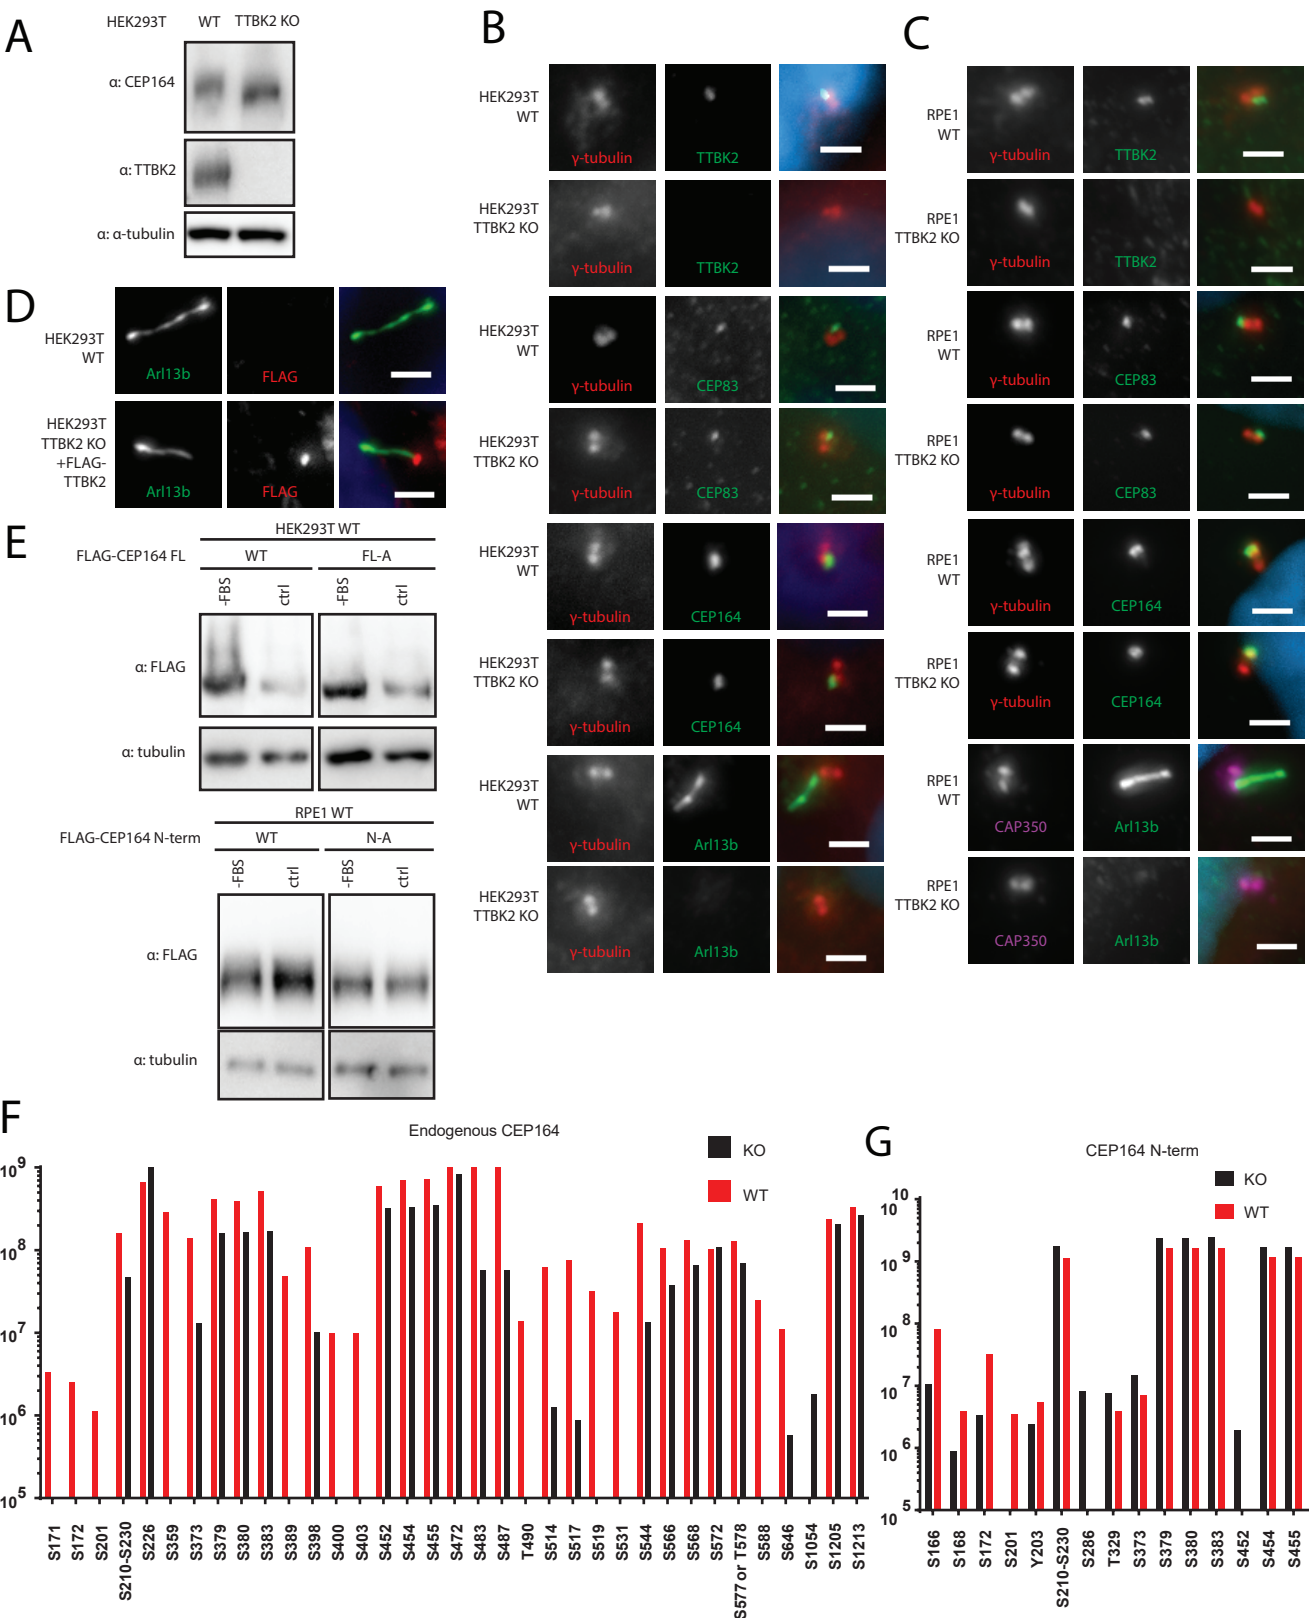

### Supplementary figure 1. Schematized workflow of MS/MS experiments

**A:** HEK293T cells were transfected by tested substrate or TTBK2 WT/KD. Proteins of interest were purified by immunoprecipitation. Additional treatment with  $\lambda$  phosphatase was performed in second experimental repeat. Tested substrates proteins were subjected to *in vitro* kinase assay with TTBK2 WT or KD (control). Following SDS-PAGE separation samples were analyzed by MS/MS to identify phosphorylations. **B:** Transfected TTBK2 WT or TTBK2 KD were isolated from HEK293T cells by immunoprecipitation. In total, four conditions were prepared, as indicated - ① TTBK2 WT, ② TTBK2 WT treated with  $\lambda$ -phosphatase, ③ TTBK2 WT treated with  $\lambda$ -phosphatase subsequently subjected to *in vitro* kinase assay, and ④ phosphatase-treated TTBK2 KD subjected to *in vitro* kinase assay. Following SDS-PAGE separation samples were analyzed by MS/MS to identify phosphorylations. Condition ③ was compared to conditions ② and ④, respectively based on criteria described in M&M section. Sample ① was used as reference to monitor phosphatase treatment effectivity. **C:** Tested substrate transiently expressed in HEK293T cells together with exogenous TTBK2 WT or empty plasmid (mock) was purified by immunoprecipitation and following SDS-PAGE separation analyzed by MS/MS. Identified phosphorylations found in condition with TTBK2 WT were compared to those found in mock condition, based on criteria described in the M&M section.

### Supplementary figure 2. Summary of phosphorylations identified for depicted substrates *in vitro*.

For each S/T site on x axis, average phosphorylation intensity is shown in y axis (log<sub>10</sub> scale) for indicated conditions. Cases where the exact position could not be assigned are indicated as (/) for two possible positions or (-) for clusters. **A:** Graphical summary of phosphorylations detected *in vitro* in following conditions. Black – Substrate + TTBK2 KD (Mock), Red – Substrate + TTBK2 WT, Grey – Substrate +  $\lambda$  phosphatase treatment + TTBK2 KD (Mock), Blue – Substrate +  $\lambda$  phosphatase treatment + TTBK2 WT. **B:** Graphical summary of phosphorylations detected in TTBK2 autophosphorylation dataset in following conditions : ① Black –TTBK2 WT, ② Grey – TTBK2 WT+ $\lambda$  phosphatase treatment (Ctrl#1), ③ Red – TTBK2 WT +  $\lambda$  phosphatase treatment + kinase assay, ④ Brown – TTBK2 KD + phosphatase treatment + kinase assay (Ctrl#2).

### Supplementary figure 3. Summary of phosphorylations identified for depicted substrates *in vivo*.

For each S/T site on x axis, average phosphorylation intensity is shown in y axis (log<sub>10</sub> scale) for indicated conditions. Cases where the exact position could not be assigned are indicated as (/). Graphical summary of phosphorylations detected *in vivo* in following conditions: Black – Substrate + Mock, Red – Substrate + TTBK2.

### Supplementary figure 4. Disorder predictions of CEP89, CEP83, CCDC92, Rabin8 and DVL3 indicate long IDRs with multiple phosphorylation sites.

Protein disorder and phosphorylation prediction for CEP89, CEP83, CCDC92, Rabin8 and DVL3. Structure of all proteins is schematized, rectangles indicate presence of a domain or motif, the numbers indicate length of given protein in amino acids. Lines below the schematic protein structure indicate positions of each phosphorylation induced by TTBK2. The first graph below the schematized protein shows prediction of order/disorder (with cut-off 0.5) determined by PONDR using VSL2 (Violet line) and VL3-BA (Blue line) algorithms. The second graph plots Disorder Enhanced Phosphorylation



Predictor (DEPP) score (with cut-off score 0.5) and individual phosphosites thereby predicted (phosphoS as blue rectangle, phosphoT as green triangle, and phosphoY as red circle).

**Supplementary figure 5. Disorder predictions of CEP97, KIF2a, Tau and MPP9 indicate long IDRs with multiple phosphorylation sites.**

Protein disorder and phosphorylation prediction for CEP97, KIF2a, MPP9 and Tau proteins. Structure of all proteins is schematized, rectangles indicate presence of a domain or motif, the numbers indicate length of given protein in amino acids. Lines and numbers respectively, below protein structure indicate published TTBK2 phosphorylated residues (24, 29, 38, 40). The first graph below the schematized protein shows prediction of order/disorder (with cut-off 0.5) determined by PONDR using VSL2 (Violet line) and VL3-BA (Blue line) algorithms. The second graph plots Disorder Enhanced Phosphorylation Predictor (DEPP) score (with cut-off score 0.5) and individual phosphosites thereby predicted (phosphoS as blue rectangle, phosphoT as green triangle, and phosphoY as red circle).

**Suppl. Fig.6. Validation of HEK293T and RPE1 TTBK2 KO cells, MSMS analysis of CEP164 phosphorylation in HEK293T WT and TTBK2 KO cells**

**A:** WB analysis of HEK293T WT and TTBK2 KO cells. TTBK2 protein is missing in HEK293T TTBK2 KO cells, CEP164 is migrating faster in TTBK2 KO HEK293T. **B:** IC comparison of HEK293T WT and TTBK2 KO cells.  $\gamma$ -tubulin staining was used to visualize centrioles (red), in green are tested DA markers or ARL13b. Note that TTBK2 signal is missing in the HEK293T TTBK2 KO cells on MCs, while signal of DA proteins CEP83 and CEP164 is not changed. HEK293T TTBK2 KO cells do not form ARL13b+ PCs. **C:** IC comparison of RPE-1 WT and TTBK2 KO cells.  $\gamma$ -tubulin or CAP350 staining was used to visualize centrioles (red, violet), in green are tested DA markers or ARL13b. Note that TTBK2 signal is missing in the RPE1 TTBK2 KO cells on MCs, while signal of DA proteins CEP83 and CEP164 is not changed. RPE1 TTBK2 KO cells do not form ARL13b+ PCs. **D:** Transient transfection of FLAG-TTBK2 WT to HEK293T TTBK2 KO cells rescues ciliogenesis. ARL13b (green) staining was used to detect PCs respectively, expression of exogenous TTBK2 variants was detected by FLAG antibody (red). Note that FLAG-TTBK2 WT localizes to the base of PCs. **E:** WB analysis of indicated variants of CEP164. HEK293T WT and RPE1 WT cells were transfected by indicated constructs (FLAG-tagged FL CEP164 WT or FL-A mutants or CEP164 N-term WT or N-A term mutant), treated by doxycycline (FL constructs) and 12h after transfection were starved for additional 24h where indicated (-FBS). Slower migrating forms of FL CEP164 WT and CEP164 N-term WT occur upon starvation while mobility of the FL-A and N-A mutants in not changed. n=3. **F, G:** Summary of MS/MS analysis of phosphorylation of CEP164. **F:** endogenous CEP164 was immunoprecipitated from HEK293T WT and TTBK2 KO cells. **G:** FLAG-tagged CEP164 N-term was transfected to HEK293T WT and TTBK2 KO and 48h after transfection was immunoprecipitated using anti-FLAG antibody. For each S/T site on x axis, average phosphorylation intensity is shown in y axis (log<sub>10</sub> scale) for the indicated conditions. Cases where the exact position could not be assigned are indicated as (/). Conditions: Black – CEP164 in HEK293T TTBK2 KO, Red – CEP164 in HEK293T WT.

1: Name of the sheet refers to dataset (*in vitro*, *in vivo*, HEK293 wt and TTBK2 KO)

2: Number of repeats phosphorylation identified in/ total number of repeats performed

3: S/T followed by number specifies phosphoresidue

4: Number in column specifies average intensity of phosphorylation (sum of intensity/number of experiments for individual phosphosite or cluster)

5: clusters refer to phosphosites with uncertain position, "or" specifies two possible positions, "-" specifies more possible phosphorylation positions

6: Mock for *in vitro* dataset indicates use of TTBK2 KD

7: Mock for *in vivo* dataset indicates empty vector

8: Homology TTBK2 mus musculus (T2m), TTBK1 homo sapiens (T1h), mus musculus (T1m) states whether the residue in TTBK2 in homo sapiens has corresponding homologous residue in these proteins. If residue is replaced by phosphorylable residue (T/S) the swich is indicated

| In vitro | CEP164 induced | average intensity of phosphorylation |              |                                  |                                   | PhosphoS<br>itePlus |
|----------|----------------|--------------------------------------|--------------|----------------------------------|-----------------------------------|---------------------|
|          |                | CEP164+mock                          | CEP164+TTBK2 | CEP164+<br>phosphatase +<br>mock | CEP164+<br>phosphatase +<br>TTBK2 |                     |
| 1/2      | S104           | 4.E+05                               | 1.E+06       | 0.E+00                           | 6.E+05                            |                     |
| 2/2      | S135           | 0.E+00                               | 8.E+08       | 0.E+00                           | 5.E+08                            |                     |
| 1/2      | S 159          | 8.E+05                               | 6.E+07       | 0.E+00                           | 0.E+00                            |                     |
| 2/2      | S164           | 4.E+06                               | 5.E+08       | 0.E+00                           | 9.E+07                            |                     |
| 2/2      | S166           | 2.E+06                               | 4.E+08       | 0.E+00                           | 2.E+08                            |                     |
| 1/2      | S168           | 6.E+04                               | 1.E+08       | 0.E+00                           | 6.E+07                            |                     |
| 2/2      | S201           | 3.E+06                               | 7.E+08       | 0.E+00                           | 1.E+08                            | *                   |
| 2/2      | S257           | 4.E+05                               | 9.E+07       | 0.E+00                           | 2.E+07                            |                     |
| 1/2      | S304           | 8.E+06                               | 2.E+07       | 0.E+00                           | 0.E+00                            |                     |
| 1/2      | T329           | 9.E+05                               | 3.E+06       | 0.E+00                           | 0.E+00                            |                     |
| 2/2      | S359           | 5.E+05                               | 3.E+08       | 0.E+00                           | 5.E+07                            | *                   |
| 2/2      | S407           | 0.E+00                               | 8.E+07       | 0.E+00                           | 2.E+07                            | *                   |
| 1/2      | S822           | 0.E+00                               | 6.E+06       | 0.E+00                           | 0.E+00                            |                     |
| 1/2      | S1112          | 0.E+00                               | 2.E+07       | 0.E+00                           | 0.E+00                            |                     |
| 1/2      | S1144          | 3.E+06                               | 8.E+06       | 0.E+00                           | 3.E+06                            |                     |
| 2/2      | S1347          | 2.E+06                               | 4.E+07       | 0.E+00                           | 0.E+00                            |                     |
| 2/2      | S1443          | 1.E+07                               | 2.E+07       | 0.E+00                           | 0.E+00                            | *                   |
|          | clusters       |                                      |              |                                  |                                   |                     |
| 2/2      | S129-S136      | 0.E+00                               | 8.E+08       | 0.E+00                           | 5.E+08                            |                     |
| 2/2      | S1093-S1096    | 0.E+00                               | 2.E+07       | 0.E+00                           | 0.E+00                            |                     |

| In vitro | Cep164 non-<br>induced | average intensity of phosphorylation |              |                                  |                                   | PhosphoS<br>itePlus |
|----------|------------------------|--------------------------------------|--------------|----------------------------------|-----------------------------------|---------------------|
|          |                        | CEP164+mock                          | CEP164+TTBK2 | CEP164+<br>phosphatase +<br>mock | CEP164+<br>phosphatase +<br>TTBK2 |                     |
| 1/2      | S210                   | 8.E+08                               | 1.E+09       | 1.E+09                           | 1.E+09                            |                     |
| 2/2      | S226                   | 7.E+07                               | 1.E+08       | 2.E+07                           | 2.E+07                            |                     |
| 1/2      | S273                   | 4.E+06                               | 3.E+06       | 0.E+00                           | 0.E+00                            | *                   |
| 2/2      | S286                   | 4.E+08                               | 8.E+08       | 7.E+08                           | 1.E+09                            | *                   |
| 2/2      | S383                   | 8.E+07                               | 1.E+08       | 0.E+00                           | 0.E+00                            |                     |
| 2/2      | S420                   | 8.E+08                               | 1.E+09       | 0.E+00                           | 2.E+06                            |                     |
| 2/2      | S430                   | 1.E+07                               | 2.E+07       | 0.E+00                           | 0.E+00                            | *                   |
| 2/2      | S452                   | 2.E+08                               | 6.E+08       | 1.E+07                           | 1.E+07                            |                     |
| 2/2      | S455                   | 3.E+08                               | 5.E+08       | 1.E+07                           | 4.E+06                            | *                   |
| 2/2      | S472                   | 3.E+08                               | 3.E+08       | 0.E+00                           | 0.E+00                            | *                   |
| 1/2      | S487                   | 1.E+07                               | 1.E+07       | 0.E+00                           | 1.E+07                            |                     |
| 2/2      | S514                   | 9.E+06                               | 2.E+07       | 0.E+00                           | 0.E+00                            |                     |
| 2/2      | S517                   | 7.E+07                               | 4.E+07       | 0.E+00                           | 0.E+00                            |                     |
| 1/2      | S519                   | 1.E+06                               | 1.E+07       | 0.E+00                           | 0.E+00                            |                     |
| 2/2      | S531                   | 9.E+08                               | 7.E+08       | 4.E+06                           | 4.E+07                            |                     |
| 2/2      | S544                   | 5.E+08                               | 5.E+08       | 3.E+08                           | 3.E+08                            |                     |
| 2/2      | S566                   | 1.E+10                               | 1.E+10       | 9.E+06                           | 1.E+07                            | *                   |
| 1/2      | S568                   | 5.E+09                               | 4.E+09       | 0.E+00                           | 0.E+00                            | *                   |
| 1/2      | S572                   | 5.E+09                               | 4.E+09       | 0.E+00                           | 0.E+00                            | *                   |
| 1/2      | S588                   | 2.E+07                               | 2.E+07       | 6.E+06                           | 1.E+07                            | *                   |
| 1/2      | S643                   | 8.E+06                               | 6.E+06       | 0.E+00                           | 0.E+00                            |                     |
| 1/2      | T976                   | 1.E+06                               | 1.E+06       | 1.E+06                           | 1.E+06                            |                     |
| 1/2      | S1053                  | 1.E+08                               | 1.E+08       | 1.E+08                           | 1.E+08                            |                     |
| 1/2      | S1068                  | 3.E+06                               | 2.E+06       | 0.E+00                           | 0.E+00                            |                     |
| 2/2      | S1080                  | 3.E+09                               | 3.E+09       | 3.E+07                           | 4.E+07                            |                     |
| 2/2      | S1085                  | 3.E+09                               | 3.E+09       | 4.E+06                           | 3.E+06                            | *                   |
| 1/2      | S1205                  | 4.E+08                               | 3.E+08       | 0.E+00                           | 0.E+00                            | *                   |
| 2/2      | S1213                  | 2.E+09                               | 1.E+09       | 1.E+08                           | 2.E+08                            |                     |
| 2/2      | S1238                  | 5.E+08                               | 4.E+08       | 1.E+07                           | 3.E+07                            |                     |
| 1/2      | S1252                  | 4.E+06                               | 2.E+06       | 2.E+06                           | 4.E+06                            |                     |
| 2/2      | S1255                  | 1.E+07                               | 2.E+07       | 2.E+06                           | 1.E+07                            |                     |
| 1/2      | T1257                  | 1.E+06                               | 2.E+06       | 0.E+00                           | 0.E+00                            |                     |
| 2/2      | T1309                  | 8.E+06                               | 4.E+06       | 0.E+00                           | 0.E+00                            |                     |
| 2/2      | S1317                  | 2.E+07                               | 1.E+07       | 0.E+00                           | 0.E+00                            |                     |
| 1/2      | S1374                  | 2.E+07                               | 1.E+07       | 0.E+00                           | 0.E+00                            |                     |
| 1/2      | T1435                  | 1.E+06                               | 3.E+05       | 0.E+00                           | 0.E+00                            | *                   |
|          | clusters               |                                      |              |                                  |                                   |                     |
| 2/2      | T280 - S292            | 4.E+08                               | 8.E+08       | 7.E+08                           | 1.E+09                            | *                   |
| 2/2      | S379 - S389            | 2.E+08                               | 2.E+08       | 1.E+07                           | 2.E+07                            | *                   |
| 2/2      | S577 or T578           | 2.E+07                               | 2.E+07       | 0.E+00                           | 0.E+00                            | *                   |
| 1/2      | T1047 or S1054         | 9.E+07                               | 8.E+07       | 0.E+00                           | 0.E+00                            | *                   |
| 2/2      | T1220 - S1238          | 5.E+08                               | 4.E+08       | 1.E+07                           | 3.E+07                            |                     |
| 1/2      | S1280 - S1289          | 1.E+07                               | 2.E+07       | 0.E+00                           | 0.E+00                            | *                   |

| In vitro | CEP83 induced | average intensity of phosphorylation |            |             |                                 | PhosphoS<br>itePlus |
|----------|---------------|--------------------------------------|------------|-------------|---------------------------------|---------------------|
|          |               | phosphoresidue                       | CEP83+mock | CEP83+TTBK2 | CEP83+<br>phosphatase +<br>mock |                     |
| 2/2      | S241          | 6.E+05                               | 1.E+08     | 0.E+00      | 6.E+05                          |                     |
| 1/2      | S346          | 0.E+00                               | 5.E+06     | 0.E+00      | 0.E+00                          |                     |
| 2/2      | T527          | 2.E+06                               | 6.E+06     | 0.E+00      | 0.E+00                          |                     |
| 2/2      | T597          | 6.E+05                               | 1.E+08     | 0.E+00      | 6.E+06                          |                     |
|          | clusters      |                                      |            |             |                                 |                     |
| 1/2      | S286 or S287  | 5.E+05                               | 6.E+06     | 0.E+00      | 0.E+00                          |                     |

| In vitro | Cep83 non-induced | average intensity of phosphorylation |            |             |                                | PhosphoS<br>itePlus |
|----------|-------------------|--------------------------------------|------------|-------------|--------------------------------|---------------------|
|          |                   | phosphoresidue                       | CEP83+mock | CEP83+TTBK2 | CEP83+<br>phosphatase+<br>mock |                     |
| 1/2      | T111              | 1.E+07                               | 2.E+07     | 0.E+00      | 0.E+00                         | *                   |
| 1/2      | S353              | 6.E+07                               | 8.E+07     | 0.E+00      | 0.E+00                         |                     |
| 2/2      | S698              | 8.E+08                               | 1.E+09     | 1.E+06      | 7.E+06                         | *                   |
| 2/2      | S699              | 5.E+07                               | 1.E+08     | 0.E+00      | 0.E+00                         |                     |

| In vitro | CEP89 induced | average intensity of phosphorylation |            |             |                                | PhosphoS<br>itePlus |
|----------|---------------|--------------------------------------|------------|-------------|--------------------------------|---------------------|
|          |               | phosphoresidue                       | CEP89+mock | CEP89+TTBK2 | CEP89+<br>phosphatase+<br>mock |                     |
| 1/2      | S25           | 5.E+05                               | 1.E+07     | 0.E+00      | 0.E+00                         |                     |
| 2/2      | S144          | 1.E+07                               | 7.E+07     | 0.E+00      | 0.E+00                         | *                   |
| 1/2      | S600          | 0.E+00                               | 5.E+06     | 0.E+00      | 0.E+00                         |                     |
| 2/2      | S669          | 0.E+00                               | 1.E+07     | 0.E+00      | 1.E+06                         |                     |

| In vitro | CEP89 non-induced | average intensity of phosphorylation |            |             |                                | PhosphoS<br>itePlus |
|----------|-------------------|--------------------------------------|------------|-------------|--------------------------------|---------------------|
|          |                   | phosphoresidue                       | CEP89+mock | CEP89+TTBK2 | CEP89+<br>phosphatase+<br>mock |                     |
| 2/2      | S44               | 6.E+08                               | 5.E+08     | 2.E+07      | 1.E+07                         | *                   |
| 2/2      | S50               | 2.E+07                               | 3.E+07     | 0.E+00      | 0.E+00                         | *                   |
| 1/2      | S113              | 3.E+08                               | 2.E+08     | 0.E+00      | 0.E+00                         | *                   |
| 1/2      | S117              | 2.E+08                               | 2.E+08     | 0.E+00      | 0.E+00                         |                     |
| 1/2      | S134              | 2.E+07                               | 2.E+07     | 0.E+00      | 0.E+00                         |                     |
| 2/2      | S153              | 1.E+06                               | 0.E+00     | 0.E+00      | 0.E+00                         | *                   |
| 1/2      | S293              | 5.E+07                               | 4.E+07     | 0.E+00      | 0.E+00                         |                     |
| 1/2      | S340              | 6.E+07                               | 4.E+07     | 0.E+00      | 0.E+00                         |                     |
| 1/2      | S344              | 3.E+07                               | 2.E+07     | 0.E+00      | 0.E+00                         |                     |
| 1/2      | S420              | 4.E+06                               | 2.E+06     | 0.E+00      | 0.E+00                         |                     |
| 1/2      | T683              | 6.E+06                               | 7.E+06     | 0.E+00      | 0.E+00                         |                     |
| 1/2      | T739              | 3.E+06                               | 2.E+06     | 0.E+00      | 0.E+00                         | *                   |
|          | clusters          |                                      |            |             |                                |                     |
| 2/2      | S75 - S79         | 1.E+08                               | 6.E+07     | 0.E+00      | 0.E+00                         | *                   |

| In vitro | CCDC92 induced | average intensity of phosphorylation |             |              |                                 | PhosphoS<br>itePlus |
|----------|----------------|--------------------------------------|-------------|--------------|---------------------------------|---------------------|
|          |                | phosphoresidue                       | CCDC92+mock | CCDC92+TTBK2 | CCDC92+<br>phosphatase+<br>mock |                     |
| 1/1      | S176           | 2.E+07                               | 2.E+08      | 2.E+06       | 3.E+07                          |                     |
| 1/1      | S188           | 1.E+07                               | 9.E+07      | 7.E+06       | 3.E+07                          |                     |
| 1/1      | S209           | 4.E+06                               | 5.E+08      | 3.E+06       | 2.E+08                          | *                   |
| 1/1      | S211           | 5.E+08                               | 1.E+09      | 1.E+07       | 2.E+08                          | *                   |
| 1/1      | T299           | 7.E+05                               | 3.E+06      | 0.E+00       | 0.E+00                          | *                   |
| 1/1      | T309           | 0.E+00                               | 7.E+08      | 0.E+00       | 6.E+07                          |                     |

| CCDC92 non-induced | average intensity of phosphorylation |             |              |                                 | PhosphoS<br>itePlus |
|--------------------|--------------------------------------|-------------|--------------|---------------------------------|---------------------|
|                    | phosphoresidue                       | CCDC92+mock | CCDC92+TTBK2 | CCDC92+<br>phosphatase+<br>mock |                     |
|                    |                                      |             |              |                                 |                     |

| In vitro | Rabin8 induced | average intensity of phosphorylation |             |              |                                 | PhosphoS<br>itePlus |
|----------|----------------|--------------------------------------|-------------|--------------|---------------------------------|---------------------|
|          |                | phosphoresidue                       | Rabin8+mock | Rabin8+TTBK2 | Rabin8+<br>phosphatase+<br>mock |                     |
| 1/1      | S165           | 0.E+00                               | 2.E+06      | 0.E+00       | 0.E+00                          | *                   |
| 1/1      | S301           | 0.E+00                               | 3.E+07      | 0.E+00       | 9.E+06                          | *                   |

| In vitro | Rabin8 non-induced | average intensity of phosphorylation |             |              |                                 | PhosphoS<br>itePlus |
|----------|--------------------|--------------------------------------|-------------|--------------|---------------------------------|---------------------|
|          |                    | phosphoresidue                       | Rabin8+mock | Rabin8+TTBK2 | Rabin8+<br>phosphatase+<br>mock |                     |
| 1/1      | S87                | 1.E+07                               | 1.E+07      | 0.E+00       | 0.E+00                          | *                   |
| 1/1      | S163               | 1.E+07                               | 1.E+07      | 0.E+00       | 0.E+00                          | *                   |
| 1/1      | S266               | 1.E+09                               | 1.E+09      | 0.E+00       | 0.E+00                          | *                   |
| 1/1      | S288               | 8.E+08                               | 7.E+08      | 2.E+06       | 1.E+07                          | *                   |
|          | clusters           |                                      |             |              |                                 |                     |
| 1/1      | S261 - S266        | 2.E+07                               | 2.E+07      | 0.E+00       | 0.E+00                          | *                   |



|     |                |        |        |        |        |   |                     |
|-----|----------------|--------|--------|--------|--------|---|---------------------|
| 2/2 | S817           | 9.E+09 | 1.E+07 | 4.E+09 | 4.E+06 | * | -                   |
| 2/2 | T820           | 4.E+09 | 0.E+00 | 9.E+09 | 0.E+00 |   | T2m                 |
| 2/2 | T826           | 0.E+00 | 0.E+00 | 2.E+08 | 0.E+00 |   | T1h-S, T1m-S, T2m-S |
| 2/2 | T828           | 0.E+00 | 0.E+00 | 2.E+08 | 0.E+00 | * | T2m                 |
| 2/2 | S832           | 0.E+00 | 0.E+00 | 2.E+07 | 0.E+00 |   | T1h, T1m, T2m       |
| 2/2 | T848           | 0.E+00 | 0.E+00 | 8.E+08 | 0.E+00 |   | T1h-S, T1m-S        |
| 2/2 | T851           | 0.E+00 | 0.E+00 | 4.E+08 | 0.E+00 |   | T2m                 |
| 2/2 | S852           | 5.E+08 | 0.E+00 | 5.E+09 | 0.E+00 |   | T2m                 |
| 2/2 | S855           | 7.E+08 | 8.E+06 | 2.E+10 | 9.E+05 |   | T2m                 |
| 2/2 | S886           | 1.E+09 | 0.E+00 | 2.E+09 | 0.E+00 |   | T2m                 |
| 2/2 | S897           | 0.E+00 | 0.E+00 | 8.E+08 | 0.E+00 |   | T2m                 |
| 2/2 | T898           | 2.E+07 | 0.E+00 | 8.E+08 | 0.E+00 |   | -                   |
| 2/2 | S921           | 5.E+08 | 0.E+00 | 3.E+09 | 0.E+00 |   | T1h, T1m, T2m       |
| 2/2 | T929           | 0.E+00 | 0.E+00 | 2.E+09 | 0.E+00 |   | T2m, T1m-S          |
| 2/2 | S954           | 2.E+08 | 0.E+00 | 5.E+09 | 0.E+00 |   | T2m, T1h-T, T1m-T   |
| 2/2 | T955           | 0.E+00 | 0.E+00 | 3.E+08 | 0.E+00 |   | T2m                 |
| 2/2 | S958           | 5.E+07 | 0.E+00 | 1.E+09 | 0.E+00 |   | T2m                 |
| 2/2 | S959           | 2.E+07 | 0.E+00 | 1.E+09 | 0.E+00 |   | T1h, T1m, T2m       |
| 2/2 | S960           | 1.E+07 | 0.E+00 | 5.E+08 | 0.E+00 | * | T2m                 |
| 2/2 | S963           | 7.E+08 | 9.E+06 | 9.E+09 | 0.E+00 | * | T1h, T1m, T2m       |
| 2/2 | S990           | 0.E+00 | 0.E+00 | 3.E+08 | 0.E+00 |   | T2m                 |
| 2/2 | S996           | 1.E+08 | 4.E+07 | 2.E+10 | 5.E+06 |   | T1h, T1m, T2m       |
| 2/2 | S999           | 5.E+07 | 0.E+00 | 9.E+09 | 0.E+00 |   | T1h, T1m, T2m       |
| 2/2 | T1009          | 0.E+00 | 0.E+00 | 9.E+07 | 0.E+00 |   | -                   |
| 2/2 | S1024          | 0.E+00 | 0.E+00 | 4.E+08 | 0.E+00 |   | T1h, T1m, T2m       |
| 2/2 | S1030          | 6.E+07 | 0.E+00 | 7.E+09 | 0.E+00 |   | T2m, T1m-T          |
| 2/2 | S1033          | 4.E+08 | 0.E+00 | 1.E+10 | 0.E+00 |   | T2m                 |
| 2/2 | S1035          | 5.E+07 | 0.E+00 | 7.E+08 | 0.E+00 |   | T2m                 |
| 2/2 | S1039          | 4.E+08 | 0.E+00 | 6.E+09 | 0.E+00 | * | T2m                 |
| 2/2 | S1042          | 2.E+08 | 0.E+00 | 3.E+09 | 0.E+00 | * | T2m                 |
| 2/2 | S1046          | 0.E+00 | 0.E+00 | 8.E+08 | 0.E+00 |   | T2m                 |
| 2/2 | S1048          | 3.E+06 | 0.E+00 | 2.E+09 | 0.E+00 |   | T1m-T               |
| 2/2 | S1100          | 3.E+07 | 0.E+00 | 2.E+08 | 0.E+00 |   | T2m, T1h            |
| 2/2 | S1101          | 5.E+07 | 0.E+00 | 8.E+08 | 0.E+00 |   | T2m                 |
| 2/2 | S1103          | 6.E+08 | 3.E+06 | 2.E+09 | 9.E+06 | * | T2m                 |
| 2/2 | S1105          | 1.E+07 | 0.E+00 | 2.E+08 | 0.E+00 |   | T2m                 |
| 2/2 | S1109          | 2.E+07 | 0.E+00 | 3.E+09 | 0.E+00 |   | T2m                 |
| 2/2 | T1163          | 0.E+00 | 0.E+00 | 7.E+07 | 0.E+00 |   | T2m                 |
| 2/2 | S1182          | 1.E+09 | 8.E+08 | 4.E+09 | 3.E+08 |   | T2m                 |
|     |                |        |        |        |        |   |                     |
|     | clusters       |        |        |        |        |   |                     |
| 2/2 | S936 or S937   | 0.E+00 | 0.E+00 | 1.E+08 | 0.E+00 |   | T2m                 |
| 2/2 | S1180 or S1181 | 3.E+08 | 2.E+07 | 2.E+10 | 9.E+06 |   | T2m                 |
| 2/2 | S1240 or S1243 | 1.E+10 | 3.E+07 | 2.E+09 | 9.E+06 |   | T2m                 |

| In vivo                   | CEP164 induced | average intensity of phosphorylation |              | PhosphoSitePlus |
|---------------------------|----------------|--------------------------------------|--------------|-----------------|
|                           | phosphoresidue | CEP164+mock                          | CEP164+TTBK2 |                 |
| no.identified/no .repeats |                |                                      |              |                 |
| 1/1                       | S94            | 1.E+06                               | 4.E+07       |                 |
| 1/1                       | S104           | 2.E+06                               | 1.E+08       |                 |
| 1/1                       | S129           | 5.E+05                               | 8.E+08       |                 |
| 1/1                       | S130           | 5.E+05                               | 8.E+08       |                 |
| 1/1                       | S135           | 1.E+06                               | 2.E+09       |                 |
| 1/1                       | S136           | 1.E+06                               | 2.E+09       |                 |
| 1/1                       | S166           | 4.E+06                               | 1.E+09       |                 |
| 1/1                       | S168           | 2.E+07                               | 2.E+09       |                 |
| 1/1                       | S171           | 0.E+00                               | 1.E+08       |                 |
| 1/1                       | S172           | 7.E+07                               | 5.E+08       |                 |
| 1/1                       | S201           | 5.E+08                               | 2.E+09       | *               |
| 1/1                       | S270           | 1.E+09                               | 5.E+09       | *               |
| 1/1                       | S273           | 1.E+09                               | 5.E+09       | *               |

| In vivo                   | CEP164 non-induced | average intensity of phosphorylation |              | PhosphoSitePlus |
|---------------------------|--------------------|--------------------------------------|--------------|-----------------|
|                           | phosphoresidue     | CEP164+mock                          | CEP164+TTBK2 |                 |
| no.identified/no .repeats |                    |                                      |              |                 |
| 1/1                       | S25                | 0.E+00                               | 1.E+07       |                 |
| 1/1                       | T156               | 6.E+08                               | 3.E+08       |                 |
| 1/1                       | T218               | 3.E+07                               | 4.E+07       |                 |
| 1/1                       | S226               | 2.E+07                               | 8.E+06       |                 |
| 1/1                       | S230               | 4.E+06                               | 0.E+00       |                 |
| 1/1                       | S233               | 4.E+06                               | 0.E+00       |                 |
| 1/1                       | S286               | 3.E+09                               | 1.E+09       | *               |
| 1/1                       | S291               | 2.E+08                               | 2.E+08       |                 |
| 1/1                       | S292               | 5.E+05                               | 6.E+07       |                 |
| 1/1                       | S379               | 1.E+09                               | 1.E+08       |                 |
| 1/1                       | S380               | 3.E+07                               | 2.E+07       |                 |
| 1/1                       | S383               | 3.E+07                               | 2.E+07       |                 |
| 1/1                       | S420               | 4.E+08                               | 4.E+08       |                 |

|     |              |        |        |   |
|-----|--------------|--------|--------|---|
| 1/1 | T280         | 1.E+08 | 4.E+08 |   |
| 1/1 | S304         | 4.E+06 | 1.E+08 |   |
| 1/1 | S319         | 4.E+06 | 7.E+09 | * |
| 1/1 | S337         | 0.E+00 | 1.E+09 |   |
| 1/1 | S343         | 0.E+00 | 5.E+08 |   |
| 1/1 | S359         | 0.E+00 | 5.E+09 | * |
| 1/1 | S398         | 0.E+00 | 6.E+07 |   |
| 1/1 | S400         | 1.E+07 | 2.E+08 |   |
| 1/1 | S403         | 0.E+00 | 2.E+08 |   |
| 1/1 | S407         | 3.E+06 | 1.E+09 | * |
| 1/1 | S452         | 3.E+07 | 2.E+08 |   |
| 1/2 | S487         | 7.E+06 | 6.E+08 |   |
| 1/2 | T490         | 0.E+00 | 7.E+07 |   |
| 1/2 | S514         | 9.E+07 | 2.E+09 |   |
| 1/2 | S517         | 1.E+07 | 7.E+08 |   |
| 1/2 | S519         | 3.E+06 | 1.E+08 |   |
| 2/2 | S588         | 0.E+00 | 3.E+08 | * |
| 1/2 | S643         | 1.E+07 | 2.E+08 |   |
| 1/2 | S645         | 0.E+00 | 3.E+07 |   |
| 1/2 | S646         | 0.E+00 | 2.E+08 | * |
| 1/2 | S679         | 0.E+00 | 4.E+07 |   |
| 1/2 | S680         | 2.E+06 | 1.E+07 |   |
| 1/2 | S695         | 0.E+00 | 1.E+08 |   |
| 2/2 | S732         | 0.E+00 | 4.E+08 |   |
| 2/2 | S735         | 1.E+06 | 2.E+09 | * |
| 1/2 | T765         | 0.E+00 | 1.E+07 |   |
| 2/2 | S771         | 1.E+09 | 5.E+09 |   |
| 1/2 | S779         | 2.E+06 | 4.E+07 |   |
| 1/2 | S780         | 5.E+06 | 1.E+08 |   |
| 1/2 | S791         | 0.E+00 | 1.E+07 |   |
| 1/2 | S822         | 1.E+06 | 9.E+06 |   |
| 1/2 | S833         | 0.E+00 | 2.E+07 |   |
| 1/2 | S834         | 3.E+06 | 1.E+08 |   |
| 3/3 | S970         | 0.E+00 | 2.E+08 |   |
| 2/3 | S1013        | 4.E+06 | 1.E+08 | * |
| 2/3 | S1022        | 0.E+00 | 7.E+06 | * |
| 3/3 | S1030        | 2.E+05 | 1.E+08 |   |
| 2/3 | S1031        | 2.E+06 | 2.E+08 |   |
| 2/3 | S1054        | 4.E+08 | 2.E+09 | * |
| 1/3 | S1081        | 2.E+06 | 2.E+07 |   |
| 2/3 | S1093        | 0.E+00 | 5.E+06 |   |
| 2/3 | S1095        | 0.E+00 | 5.E+06 |   |
| 3/3 | S1112        | 0.E+00 | 1.E+08 |   |
| 2/3 | S1144        | 1.E+07 | 1.E+09 |   |
| 1/3 | S1199        | 4.E+08 | 1.E+09 |   |
| 2/3 | S1255        | 3.E+07 | 2.E+09 |   |
| 2/3 | S1267        | 6.E+06 | 7.E+07 | * |
| 2/3 | S1317        | 5.E+07 | 1.E+08 |   |
| 3/3 | S1346        | 2.E+06 | 3.E+08 |   |
| 3/3 | S1347        | 2.E+06 | 7.E+08 |   |
| 1/3 | T1351        | 0.E+00 | 3.E+07 |   |
| 2/3 | S1386        | 1.E+06 | 4.E+07 | * |
| 1/3 | S1388        | 0.E+00 | 1.E+07 | * |
| 3/3 | T1435        | 5.E+06 | 6.E+07 | * |
| 2/3 | S1443        | 5.E+06 | 1.E+08 | * |
|     |              |        |        |   |
|     | clusters     |        |        |   |
| 1/2 | S577 or T578 | 1.E+08 | 3.E+09 | * |

| In vivo | CEP83 induced | average intensity of phosphorylation |  |
|---------|---------------|--------------------------------------|--|
|---------|---------------|--------------------------------------|--|

|     |                |        |        |   |
|-----|----------------|--------|--------|---|
| 1/1 | S430           | 9.E+07 | 1.E+08 | * |
| 1/1 | S455           | 3.E+07 | 1.E+07 | * |
| 1/1 | S472           | 9.E+08 | 1.E+09 | * |
| 1/2 | S523           | 0.E+00 | 7.E+06 |   |
| 2/2 | S531           | 5.E+08 | 1.E+08 |   |
| 2/2 | S544           | 7.E+08 | 5.E+10 |   |
| 2/2 | S566           | 6.E+10 | 1.E+11 | * |
| 2/2 | T568           | 1.E+10 | 2.E+10 | * |
| 2/2 | S572           | 5.E+10 | 9.E+10 | * |
| 1/3 | S1080          | 1.E+05 | 1.E+06 | * |
| 2/3 | S1205          | 2.E+08 | 1.E+09 |   |
| 2/3 | T1209          | 1.E+07 | 2.E+07 |   |
| 3/3 | S1213          | 5.E+09 | 5.E+09 |   |
| 2/3 | S1224          | 8.E+05 | 4.E+06 |   |
| 1/3 | S1233          | 6.E+07 | 3.E+07 |   |
| 1/3 | S1234          | 3.E+07 | 2.E+07 |   |
| 1/3 | S1238          | 6.E+08 | 1.E+08 |   |
| 2/3 | S1252          | 1.E+07 | 1.E+08 | * |
| 2/3 | T1253          | 2.E+07 | 5.E+08 |   |
| 1/3 | S1258          | 4.E+06 | 7.E+06 |   |
| 2/3 | T1309          | 5.E+07 | 9.E+07 |   |
| 1/3 | S1322          | 0.E+00 | 4.E+06 | * |
| 1/3 | S1372          | 0.E+00 | 7.E+06 |   |
| 3/3 | S1374          | 6.E+07 | 3.E+08 |   |
| 1/3 | S1397          | 0.E+00 | 4.E+06 |   |
| 1/3 | S1399          | 0.E+00 | 4.E+06 |   |
| 1/3 | S1406          | 0.E+00 | 7.E+06 |   |
| 1/3 | T1408          | 0.E+00 | 7.E+06 |   |
|     |                |        |        |   |
|     | clusters       |        |        |   |
| 1/3 | S1230 or S1231 | 2.E+07 | 6.E+06 |   |
| 1/3 | S1325 or S1326 | 0.E+00 | 4.E+06 |   |

| In vivo | CEP83 non-induced | average intensity of phosphorylation | <a href="#">PhosphoSitePlus</a> |
|---------|-------------------|--------------------------------------|---------------------------------|
|---------|-------------------|--------------------------------------|---------------------------------|

| no.identified/no .repeats | phosphoresidue | CEP83+mock | CEP83+TTBK2 | PhosphoSitePlus |
|---------------------------|----------------|------------|-------------|-----------------|
| 1/2                       | S27            | 1.E+07     | 3.E+07      |                 |
| 1/2                       | T51            | 2.E+07     | 4.E+07      |                 |
| 2/2                       | T111           | 2.E+07     | 7.E+07      | *               |
| 2/2                       | S182           | 0.E+00     | 1.E+08      |                 |
| 2/2                       | S241           | 9.E+05     | 8.E+08      |                 |
| 2/2                       | S265           | 0.E+00     | 9.E+07      |                 |
| 1/2                       | S272           | 3.E+05     | 9.E+07      |                 |
| 2/2                       | S286           | 0.E+00     | 5.E+08      |                 |
| 2/2                       | S288           | 0.E+00     | 1.E+09      | *               |
| 1/2                       | T292           | 0.E+00     | 2.E+07      |                 |
| 2/2                       | S318           | 7.E+04     | 9.E+08      |                 |
| 1/2                       | T324           | 0.E+00     | 1.E+07      |                 |
| 2/2                       | S346           | 6.E+06     | 1.E+09      |                 |
| 2/2                       | S353           | 1.E+08     | 4.E+09      |                 |
| 1/2                       | S433           | 0.E+00     | 4.E+07      |                 |
| 2/2                       | S446           | 0.E+00     | 2.E+08      |                 |
| 1/2                       | S469           | 0.E+00     | 6.E+07      |                 |
| 2/2                       | S515           | 3.E+05     | 7.E+08      |                 |
| 2/2                       | T527           | 1.E+07     | 6.E+08      |                 |
| 1/2                       | T597           | 0.E+00     | 2.E+07      |                 |
| 2/2                       | S676           | 4.E+07     | 3.E+08      | *               |
|                           | clusters       |            |             |                 |
| 2/2                       | S309 or S310   | 0.E+00     | 6.E+07      |                 |

| no.identified/no .repeats | phosphoresidue | CEP83+mock | CEP83+TTBK2 | * |
|---------------------------|----------------|------------|-------------|---|
| 2/2                       | S698           | 7.E+09     | 1.E+10      |   |
| 2/2                       | S699           | 1.E+09     | 8.E+08      |   |

| In vivo                   | CEP89 induced  | average intensity of phosphorylation |             |                 |
|---------------------------|----------------|--------------------------------------|-------------|-----------------|
| no.identified/no .repeats | phosphoresidue | CEP89+mock                           | CEP89+TTBK2 | PhosphoSitePlus |
| 2/2                       | S153           | 3.E+08                               | 3.E+09      | *               |
| 1/2                       | S256           | 0.E+00                               | 3.E+07      |                 |
| 1/2                       | S292           | 0.E+00                               | 2.E+08      |                 |
| 2/2                       | S293           | 2.E+08                               | 1.E+09      |                 |
| 1/2                       | T386           | 0.E+00                               | 3.E+07      |                 |
| 1/2                       | S415           | 0.E+00                               | 3.E+07      |                 |
| 1/2                       | S420           | 0.E+00                               | 3.E+07      |                 |
| 2/2                       | S463           | 1.E+07                               | 8.E+07      |                 |
| 1/2                       | S504           | 0.E+00                               | 4.E+07      |                 |
| 2/2                       | S558           | 6.E+07                               | 4.E+08      |                 |
| 1/2                       | T560           | 0.E+00                               | 3.E+07      | *               |
| 2/2                       | S600           | 1.E+07                               | 2.E+08      |                 |
| 2/2                       | S631           | 2.E+07                               | 3.E+08      |                 |
| 2/2                       | S669           | 0.E+00                               | 1.E+07      |                 |
| 2/2                       | T739           | 5.E+06                               | 3.E+07      | *               |

| In vivo                   | CEP89 non-induced | average intensity of phosphorylation |             |                 |
|---------------------------|-------------------|--------------------------------------|-------------|-----------------|
| no.identified/no .repeats | phosphoresidue    | CEP89+mock                           | CEP89+TTBK2 | PhosphoSitePlus |
| 1/2                       | S25               | 0.E+00                               | 7.E+05      | *               |
| 2/2                       | S50               | 1.E+08                               | 2.E+08      | *               |
| 1/2                       | S77               | 2.E+08                               | 5.E+06      | *               |
| 1/2                       | S113              | 2.E+08                               | 6.E+06      | *               |
| 2/2                       | S114              | 9.E+09                               | 2.E+08      |                 |
| 1/2                       | S117              | 2.E+08                               | 1.E+07      |                 |
| 1/2                       | S134              | 2.E+08                               | 8.E+06      |                 |
| 2/2                       | S340              | 4.E+08                               | 3.E+08      |                 |
| 2/2                       | S344              | 2.E+08                               | 8.E+08      |                 |
| 1/2                       | S515              | 7.E+06                               | 2.E+07      |                 |
| 1/2                       | S522              | 0.E+00                               | 1.E+07      |                 |
| 1/2                       | T683              | 2.E+07                               | 8.E+06      |                 |

| In vivo                   | CCDC92 induced | average intensity of phosphorylation |              |                 |
|---------------------------|----------------|--------------------------------------|--------------|-----------------|
| no.identified/no .repeats | phosphoresidue | CCDC92+mock                          | CCDC92+TTBK2 | PhosphoSitePlus |
| 1/3                       | S71            | 2.E+06                               | 3.E+07       |                 |
| 1/3                       | S79            | 6.E+07                               | 3.E+08       |                 |
| 1/3                       | S81            | 4.E+06                               | 1.E+07       |                 |
| 2/3                       | T117           | 0.E+00                               | 2.E+06       |                 |
| 1/3                       | S138           | 0.E+00                               | 6.E+07       |                 |
| 1/3                       | T142           | 0.E+00                               | 4.E+07       |                 |
| 3/3                       | S145           | 0.E+00                               | 9.E+07       |                 |
| 2/3                       | S146           | 0.E+00                               | 3.E+08       |                 |
| 1/3                       | S153           | 0.E+00                               | 1.E+07       |                 |
| 3/3                       | S160           | 6.E+04                               | 5.E+07       |                 |

| In vivo                   | CCDC92 non-induced | average intensity of phosphorylation |              | PhosphoSitePlus |
|---------------------------|--------------------|--------------------------------------|--------------|-----------------|
| no.identified/no .repeats | phosphoresidue     | CCDC92+mock                          | CCDC92+TTBK2 |                 |
| 1/3                       | S171               | 0.E+00                               | 5.E+06       |                 |
| 1/3                       | S172               | 2.E+08                               | 3.E+07       |                 |
| 1/3                       | S176               | 2.E+09                               | 4.E+08       | *               |
| 2/3                       | S179               | 1.E+10                               | 9.E+08       |                 |
| 1/3                       | S181               | 3.E+07                               | 3.E+06       | *               |
| 2/3                       | S183               | 1.E+10                               | 7.E+08       | *               |
| 3/3                       | S211               | 1.E+10                               | 8.E+09       |                 |
| 2/3                       | S277               | 4.E+07                               | 1.E+08       | *               |
| 3/3                       | T299               | 3.E+08                               | 1.E+09       |                 |
| 1/3                       | T309               | 0.E+00                               | 2.E+06       |                 |

|     |      |        |        |   |
|-----|------|--------|--------|---|
| 2/3 | S209 | 4.E+07 | 7.E+09 | * |
| 2/3 | S252 | 7.E+05 | 1.E+07 |   |
| 2/3 | S270 | 0.E+00 | 4.E+07 |   |
| 2/3 | S273 | 1.E+06 | 2.E+07 |   |

| In vivo<br>no.identified/no.<br>.repeats | Rabin8 induced<br>phosphoresidue | average intensity of phosphorylation |               | PhosphoSitePlus |
|------------------------------------------|----------------------------------|--------------------------------------|---------------|-----------------|
|                                          |                                  | Rabin8+ mock                         | Rabin8+ TTBK2 |                 |
| 1/3                                      | S98                              | 0.E+00                               | 6.E+07        |                 |
| 1/3                                      | S100                             | 0.E+00                               | 6.E+07        |                 |
| 1/3                                      | S112                             | 0.E+00                               | 4.E+08        |                 |
| 2/3                                      | S165                             | 1.E+07                               | 2.E+08        | *               |
| 1/3                                      | T213                             | 0.E+00                               | 4.E+07        |                 |
| 3/3                                      | S215                             | 6.E+05                               | 7.E+08        |                 |
| 1/3                                      | T289                             | 9.E+06                               | 8.E+07        | *               |
| 3/3                                      | S316                             | 2.E+05                               | 4.E+08        |                 |
| 1/3                                      | S358                             | 3.E+05                               | 5.E+07        |                 |
| 1/3                                      | S385                             | 0.E+00                               | 4.E+07        |                 |
| 2/3                                      | S413                             | 4.E+07                               | 2.E+08        |                 |

| In vivo<br>no.identified/no.<br>.repeats | Rabin8 non-<br>induced<br>phosphoresidue | average intensity of phosphorylation |               | PhosphoSitePlus |
|------------------------------------------|------------------------------------------|--------------------------------------|---------------|-----------------|
|                                          |                                          | Rabin8+ mock                         | Rabin8+ TTBK2 |                 |
| 1/3                                      | S32                                      | 3.E+06                               | 7.E+06        |                 |
| 1/3                                      | S35                                      | 1.E+07                               | 8.E+06        |                 |
| 3/3                                      | S86                                      | 2.E+08                               | 5.E+08        | *               |
| 3/3                                      | S87                                      | 2.E+08                               | 5.E+08        |                 |
| 1/3                                      | S97                                      | 0.E+00                               | 6.E+06        |                 |
| 3/3                                      | T111                                     | 0.E+00                               | 3.E+06        |                 |
| 1/3                                      | S144                                     | 4.E+06                               | 2.E+05        |                 |
| 1/3                                      | S147                                     | 6.E+05                               | 2.E+06        | *               |
| 2/3                                      | S154                                     | 1.E+08                               | 7.E+07        |                 |
| 1/3                                      | S157                                     | 3.E+07                               | 2.E+07        | *               |
| 3/3                                      | S163                                     | 6.E+08                               | 3.E+09        | *               |
| 3/3                                      | S263                                     | 3.E+09                               | 7.E+09        | *               |
| 2/3                                      | T265                                     | 6.E+07                               | 3.E+07        | *               |
| 3/3                                      | S266                                     | 8.E+09                               | 2.E+10        | *               |
| 2/3                                      | S288                                     | 5.E+09                               | 2.E+09        |                 |
| 1/3                                      | S290                                     | 3.E+06                               | 0.E+00        |                 |
| 1/3                                      | S291                                     | 0.E+00                               | 2.E+07        |                 |
| 2/3                                      | S294                                     | 3.E+07                               | 2.E+07        | *               |
| 2/3                                      | S296                                     | 7.E+08                               | 5.E+08        | *               |
| 1/3                                      | S301                                     | 0.E+00                               | 4.E+06        |                 |
| 1/3                                      | S370                                     | 0.E+00                               | 4.E+06        |                 |
|                                          | Clusters                                 |                                      |               |                 |
| 1/3                                      | T122 or T123                             | 0.E+00                               | 5.E+05        | *               |
| 1/3                                      | S261 or S262                             | 0.E+00                               | 1.E+08        |                 |

| no.<br>identified/no.<br>repeats | HEK293 TTBK2 | endogenous CEP164 |          |
|----------------------------------|--------------|-------------------|----------|
|                                  |              | WT                | KO       |
| 2/4                              | S171         | 3.26E+06          | 0.00E+00 |
| 4/4                              | S172         | 2.50E+06          | 0.00E+00 |
| 1/4                              | S201         | 1.11E+06          | 0.00E+00 |
| 2/4                              | S226         | 6.67E+08          | 1.85E+09 |
| 3/4                              | S359         | 2.84E+08          | 0.00E+00 |
| 2/4                              | S373         | 1.40E+08          | 1.29E+07 |
| 4/4                              | S379         | 4.09E+08          | 1.61E+08 |
| 4/4                              | S380         | 3.93E+08          | 1.63E+08 |
| 4/4                              | S383         | 5.09E+08          | 1.69E+08 |
| 3/4                              | S389         | 4.83E+07          | 0.00E+00 |
| 4/4                              | S398         | 1.09E+08          | 1.01E+07 |
| 1/4                              | S400         | 9.97E+06          | 0.00E+00 |
| 1/4                              | S403         | 9.97E+06          | 0.00E+00 |
| 4/4                              | S452         | 5.95E+08          | 3.20E+08 |
| 4/4                              | S454         | 7.01E+08          | 3.28E+08 |
| 4/4                              | S455         | 7.25E+08          | 3.48E+08 |
| 4/4                              | S472         | 1.16E+09          | 8.21E+08 |
| 2/4                              | S483         | 1.28E+09          | 5.67E+07 |
| 2/4                              | S487         | 1.36E+09          | 5.67E+07 |
| 2/4                              | T490         | 1.37E+07          | 0.00E+00 |
| 4/4                              | S514         | 6.18E+07          | 1.26E+06 |

| no.<br>identified/no.<br>repeats | HEK293 TTBK2 | FLAG-CEP164 N-term |          |
|----------------------------------|--------------|--------------------|----------|
|                                  |              | WT                 | KO       |
| 2/2                              | S166         | 7.89E+07           | 1.05E+07 |
| 2/2                              | S168         | 3.86E+06           | 8.80E+05 |
| 2/2                              | S172         | 3.23E+07           | 3.29E+06 |
| 1/2                              | S201         | 3.43E+06           | 0.00E+00 |
| 2/2                              | Y203         | 5.31E+06           | 2.41E+06 |
| 2/2                              | S210-S230    | 1.10E+09           | 1.77E+09 |
| 2/2                              | S286         | 0.00E+00           | 8.01E+06 |
| 2/2                              | T329         | 3.90E+06           | 7.61E+06 |
| 2/2                              | S373         | 7.09E+06           | 1.48E+07 |
| 2/2                              | S379         | 1.61E+09           | 2.36E+09 |
| 2/2                              | S380         | 1.62E+09           | 2.37E+09 |
| 2/2                              | S383         | 1.63E+09           | 2.39E+09 |
| 1/2                              | S452         | 0.00E+00           | 1.92E+06 |
| 2/2                              | S454         | 1.16E+09           | 1.68E+09 |
| 2/2                              | S455         | 1.16E+09           | 1.69E+09 |



|     |              |          |          |
|-----|--------------|----------|----------|
| 4/4 | S517         | 7.49E+07 | 8.60E+05 |
| 4/4 | S519         | 3.13E+07 | 0.00E+00 |
| 1/4 | S531         | 1.77E+07 | 0.00E+00 |
| 3/4 | S544         | 2.08E+08 | 1.33E+07 |
| 4/4 | S566         | 1.05E+08 | 3.74E+07 |
| 4/4 | S568         | 1.31E+08 | 6.47E+07 |
| 4/4 | S572         | 1.03E+08 | 1.08E+08 |
| 3/4 | S588         | 2.49E+07 | 0.00E+00 |
| 2/4 | S646         | 1.11E+07 | 5.65E+05 |
| 1/4 | S1054        | 0.00E+00 | 1.82E+06 |
| 4/4 | S1205        | 2.36E+08 | 2.05E+08 |
| 4/4 | S1213        | 3.27E+08 | 2.62E+08 |
|     |              |          |          |
| 2/4 | S210-S230    | 1.57E+08 | 4.63E+07 |
| 2/4 | S577 or T578 | 1.29E+08 | 6.96E+07 |

| >CEP164 |               | Peptides that contain said motif as identified by algorithm are indicated by 1 |                            |                            |
|---------|---------------|--------------------------------------------------------------------------------|----------------------------|----------------------------|
|         |               | Motif-X motif xxxxxxS/TxxExxx                                                  | MODL motif xxxxxxS/TxxExxx | MODL motif xxxxxxS/TLxxxxx |
| S94     | CDEHYRSLVIQER |                                                                                |                            | 1                          |
| S104    | QERAKLSTSGAIK |                                                                                |                            |                            |
| S129    | DRDPPKSSLALGS |                                                                                |                            |                            |
| S130    | RDPPKSSLALGSS |                                                                                |                            | 1                          |
| S135    | SSLALGSSLAPVH |                                                                                |                            |                            |
| S136    | SLALGSSLAPVHV |                                                                                |                            | 1                          |
| S159    | LVDTPPSALRGSQ |                                                                                |                            |                            |
| S164    | PSALRGSQSVSLG |                                                                                |                            |                            |
| S166    | ALRGSQSVSLGSS |                                                                                |                            |                            |
| S168    | RGSQSVSLGSSVE |                                                                                |                            | 1                          |
| S171    | QSVSLGSSVESGR | 1                                                                              | 1                          |                            |
| S172    | SVSLGSSVESGRQ |                                                                                |                            |                            |
| S201    | TKGLLSIYEDKT  | 1                                                                              | 1                          |                            |
| S257    | DFEYEESLRTSQP |                                                                                |                            | 1                          |
| S270    | EKKDVLSDSDAA  |                                                                                |                            | 1                          |
| S304    | GKGRQGSGARPGL |                                                                                |                            |                            |
| S319    | KEENEKSEPKICR |                                                                                |                            |                            |
| T329    | ICRNLVTPKADPT |                                                                                |                            |                            |
| S337    | KADPTGSEPAKAS |                                                                                |                            |                            |
| S343    | SEPAKASEKEAPE | 1                                                                              | 1                          |                            |
| S359    | DAGEEGSRREEAA | 1                                                                              | 1                          |                            |
| S398    | MKEPQLSDSIASD |                                                                                |                            |                            |
| S400    | EPQLSDSIASDPK |                                                                                |                            |                            |
| S403    | LSDSIASDPKSFH |                                                                                |                            |                            |
| S407    | IASDPKSFHGLDF |                                                                                |                            |                            |
| S452    | IEDKDDSQSSQDE |                                                                                |                            |                            |
| T490    | PPRSLATEEPPQ  |                                                                                | 1                          |                            |
| S645    | QKEQSLSLRERL  |                                                                                |                            |                            |
| S646    | KEQSLSLRERLQ  | 1                                                                              | 1                          |                            |
| S679    | LRAQVQSSTQADE |                                                                                |                            |                            |
| S680    | RAQVQSSTQADED |                                                                                |                            |                            |
| S695    | RAEQEASLQKLRE |                                                                                |                            | 1                          |
| S732    | KEEIEASEKSEQA |                                                                                |                            |                            |
| S735    | IEASEKSEQAALN |                                                                                |                            |                            |
| T765    | RKEAVATLEKEHS |                                                                                |                            | 1                          |
| S771    | TLEKEHSAELERL |                                                                                |                            |                            |
| S779    | ELERLCSSLEAKH | 1                                                                              | 1                          |                            |
| S780    | LERLCSSLEAKHR |                                                                                |                            | 1                          |
| S791    | HREVVSSLQKKIQ |                                                                                |                            | 1                          |
| S822    | HRVHQKSYHVAGY |                                                                                |                            |                            |
| S833    | GYEHELSSLLREK |                                                                                |                            |                            |
| S834    | YEHELSSLLREKR |                                                                                |                            | 1                          |
| S970    | RQVALKSEEATAT |                                                                                |                            |                            |
| S1013   | RKLKLESQVDLLQ |                                                                                |                            |                            |
| S1022   | DLLQAQSQQLQKH |                                                                                |                            |                            |
| S1030   | QLQKHFSLEAEA  | 1                                                                              | 1                          |                            |
| S1031   | LQKHFSLEAEAQ  |                                                                                |                            | 1                          |
| S1081   | TKEVSSLSQSKE  |                                                                                |                            | 1                          |
| S1093   | EDLYLDSLSSHNV |                                                                                |                            | 1                          |
| S1095   | LYLDSLSSHNVWH |                                                                                |                            |                            |
| S1096   | YLDSLSSHNVWHL |                                                                                |                            |                            |
| S1112   | EGVALRSAKEFLV | 1                                                                              | 1                          |                            |
| S1144   | WRHELASAQEVAK | 1                                                                              | 1                          |                            |
| S1199   | LNQLESSLWEEAS | 1                                                                              | 1                          |                            |
| S1267   | IHGLSHSLRQISS |                                                                                |                            | 1                          |
| S1346   | QGPRLPSSVAQTV |                                                                                |                            |                            |
| S1347   | GPRLPSSVAQTVD |                                                                                |                            |                            |
| T1351   | PSSVAQTVDDFLL |                                                                                |                            |                            |
| S1386   | SRLGYMSASEQLR | 1                                                                              | 1                          |                            |
| S1388   | LGYMSASEQLRLL |                                                                                |                            |                            |
| S1443   | KPKATLSLLQLGL |                                                                                |                            | 1                          |

|        |                |   |   |   |
|--------|----------------|---|---|---|
| >CEP83 |                |   |   |   |
| S27    | DSGLTGSQSEFQK  | 1 | 1 |   |
| T51    | HKANYQTLKAEHT  |   |   | 1 |
| S182   | GKIKYESEIARLE  |   |   |   |
| S241   | KAEKENSEAQVEN  |   |   |   |
| S265   | MQATVRSLEAEKQ  |   |   | 1 |
| S272   | LEAEKQSANLRAE  |   |   |   |
| S286   | LEKELQSSSEQNT  | 1 | 1 |   |
| S287   | EKELQSSSEQNTF  |   |   |   |
| S288   | KELQSSSEQNTFL  |   |   |   |
| T292   | SSSEQNTFLINKL  |   |   |   |
| S309   | REINTLSSKVKEL  |   |   |   |
| S310   | EINTLSSKVKELK  |   |   |   |
| S318   | VKELKHSNKLEIT  |   |   |   |
| T324   | SNKLEITDIKLET  |   |   |   |
| S346   | ERNKIQSELDGLQ  |   |   |   |
| S433   | EEKLRASQMAEEI  |   |   |   |
| S446   | TRKELQSVRLKLQ  |   |   |   |
| S469   | KEKNENSDLKQQI  |   |   |   |
| S515   | ECRNFRSQAEGAQ  | 1 | 1 |   |
| T527   | QLEAEKTLLEEKQI |   | 1 |   |
| T597   | KKEELETENQVLN  |   |   |   |
| S676   | QHORELSLLRKRL  |   |   | 1 |

|        |               |   |   |   |
|--------|---------------|---|---|---|
| >CEP89 |               |   |   |   |
| S25    | GLLPAASVAPKAA |   |   |   |
| S144   | KELGDVSAREDRG | 1 | 1 |   |
| S256   | LNNMNQSLTLELN |   |   | 1 |
| S292   | KEAEKASSQEVAA | 1 | 1 |   |
| T386   | KDELNATLKEEMR |   | 1 |   |
| S415   | HQELNKSSAVTSE |   |   |   |
| S463   | ERLQEVSKLTKQL |   |   |   |
| S504   | QELKTHSDGKIAV |   |   |   |
| S558   | LLLEKNSLTEQNK | 1 | 1 |   |
| T560   | LEKNSLTEQNKAL |   |   |   |
| S600   | AMGNEMSAHQYLA |   |   |   |
| S631   | LAKCLESEKDGVL |   |   |   |
| S669   | LKLGDISHRLLEQ |   |   |   |

|         |               |   |   |   |
|---------|---------------|---|---|---|
| >CCDC92 |               |   |   |   |
| S71     | ELTVKSSEQTGDG |   |   |   |
| S79     | QTGDGTSKSELK  |   |   |   |
| S81     | GDGTSKSELKKR  |   |   |   |
| T117    | QKNAMITVLENTI |   | 1 |   |
| S138    | EELKAKSHKLTL  |   |   |   |
| T142    | AKSHKLTLLSSEL |   |   | 1 |
| S145    | HKLTLLSSELEQR |   |   |   |
| S146    | KLTLLSSELEQRA | 1 | 1 |   |
| S153    | ELEQRASTIAYLT |   |   |   |
| S160    | TIAYLTSQLHAAK |   |   |   |
| S188    | GSPVLASYKPAPP |   |   |   |
| S209    | RRRMKKSLSAPLH |   |   | 1 |
| S252    | FLLARESAEVHLI |   |   |   |
| S270    | VIPPIASDRSGEQ |   |   |   |
| S273    | PIASDRSGEQHSP |   |   |   |
| S299    | HRIHHATPPQAQP |   |   |   |
| S309    | AQPEVKTLAVDQV |   |   | 1 |

|         |  |  |  |  |
|---------|--|--|--|--|
| >Rabin8 |  |  |  |  |
|---------|--|--|--|--|

|      |               |   |   |   |
|------|---------------|---|---|---|
|      |               |   |   |   |
| S98  | NCAEISSISFHVT |   |   |   |
| S100 | AEISSISFHVTD  |   |   |   |
| S112 | PAPCSTSGVTAGL |   |   |   |
| S165 | SRLRSPSVLEVRE | 1 | 1 |   |
| T213 | QELEELTASLFEE |   |   |   |
| S215 | LEELTASLFEEAH | 1 | 1 |   |
| T289 | HTRNKSTSSAMSG |   |   |   |
| S301 | GSHQDLSVIQPIV |   |   |   |
| S316 | CKEADLSLYNEFR |   |   | 1 |
| S358 | SKSELASAVLEAV |   |   |   |
| S385 | IRFVKASAVECGG | 1 | 1 |   |
| S413 | RIKLGSSNYYYI  |   |   |   |

|       |               |  |  |   |
|-------|---------------|--|--|---|
| >DVL3 |               |  |  |   |
|       |               |  |  |   |
| S636  | SEHSRSHHSLAS  |  |  |   |
| S639  | SHRSHHSLASSLR |  |  | 1 |
| S643  | HHSLASSLRSHHT |  |  | 1 |

|        |                |   |   |   |
|--------|----------------|---|---|---|
| >TTBK2 |                |   |   |   |
|        |                |   |   |   |
| S53    | VALKVESAQQPKQ  |   |   |   |
| T114   | QSRGFTTISTTLR  |   |   |   |
| S116   | RGFTTISTTLRLG  |   |   |   |
| T118   | TFTTISTTLRLGRQ |   |   | 1 |
| S131   | ILESIESIHSVGF  |   |   |   |
| S134   | SIESIHSVGFHLR  |   |   |   |
| S194   | GTVRYASINAHNR  |   |   |   |
| S237   | DKEQVGSIKERYD  | 1 | 1 |   |
| S332   | IGIANATPIPGDL  |   |   |   |
| S371   | PDKLPGSLGHPRP  |   |   | 1 |
| S428   | SPIRVRSEITQPD  |   |   |   |
| T431   | RVRSEITQPDRDI  |   |   |   |
| S445   | LVRKLRSIHSFEL  |   |   |   |
| S448   | KLRSIHSFELEKR  |   |   |   |
| T463   | LEPKPDTDKFLET  |   |   |   |
| T469   | TDKFLETCKEKMQ  |   | 1 |   |
| S499   | PCVPAVSRTDHIW  |   |   |   |
| S549   | CKQEIDSKWVIV   |   |   |   |
| T566   | DLQDFRTNEAVGH  |   |   |   |
| T613   | DHLKKETSGVVLAL |   |   |   |
| S614   | HLKKETSGVVLAL  |   |   |   |
| S621   | GVVLALSAEGPPT  |   |   |   |
| T627   | SAEGPPTAASEQY  |   |   |   |
| S630   | GPPTAASEQYTDR  |   |   |   |
| T634   | AASEQYTDRELELQ |   |   |   |
| T701   | LQPMPTVELYSP   |   |   |   |
| S706   | PTVELYSPRENFS  | 1 | 1 |   |
| T728   | PSGGSRDGLGLQI  |   |   |   |
| S751   | IRESNKSQDLGPK  |   |   |   |
| T777   | ENLPGETEESIL   |   |   |   |
| S781   | GETEESILLES    |   |   |   |
| S786   | KSILLESNEDEK   | 1 | 1 |   |
| S794   | NEDEKLSRGQHCI  |   |   |   |
| S804   | HCIEISSLPGLDV  |   |   | 1 |
| S817   | IVEKDHSATTEPL  |   |   |   |
| T820   | KDHSATTEPLDVT  |   |   |   |
| T826   | TEPLDVTKTQTF   |   |   |   |
| T828   | PLDVTKTQTFV    |   |   |   |
| S832   | TKTQTFVVPNQD   |   |   |   |
| T848   | EIMKLLTVGTSEI  |   |   |   |
| T851   | KLLTVGTSEISSR  |   |   |   |

|       |               |   |   |   |
|-------|---------------|---|---|---|
| S852  | LLTVGTSEISSRD |   |   |   |
| S855  | VTSEISSRDIDP  |   |   |   |
| S886  | KDDDIMSEDLPGH |   |   |   |
| S897  | GHQGDSTFLHQE  |   |   |   |
| T898  | HQGDSTFLHQEG  |   |   |   |
| S921  | ELFHCVSENEHGA | 1 | 1 |   |
| T929  | NEHGAPTRKDMVR |   |   |   |
| S936  | RKDMVRSSFVTRH |   |   |   |
| S937  | KDMVRSSFVTRHS |   |   |   |
| S954  | LAQEIDSTLESSS | 1 | 1 |   |
| T955  | AQEIDSTLESSSP |   |   | 1 |
| S958  | IDSTLESSSPVSA |   |   |   |
| S959  | DSTLESSSPVSAK |   |   |   |
| S960  | STLESSSPVSAKE |   |   |   |
| S963  | ESSPPVSAKEKLL | 1 | 1 |   |
| S990  | EKRQFKSFLGDLS |   |   |   |
| S996  | SFLGDLSASDKL  |   |   |   |
| S999  | GDLSSASDKLLEE |   |   |   |
| T1009 | LEEKLATVPAPFC |   |   |   |
| S1024 | EVLTPFSRLTVDS |   |   |   |
| S1030 | SRLTVDSHLRSA  |   |   |   |
| S1033 | TVDSHLRSAEDS  |   |   |   |
| S1035 | DSHLRSAEDSFL  |   |   |   |
| S1039 | SRSAEDSFLSPII |   |   |   |
| S1042 | AEDSFLSPIISQS |   |   |   |
| S1046 | FLSPIISQSRKSK |   |   |   |
| S1048 | SPIISQSRKSKIP |   |   |   |
| S1100 | RYKVLGSSNSDSD |   |   |   |
| S1101 | YKVLGSSNSDSDL |   |   |   |
| S1103 | VLGSSNSDSDLFS |   |   |   |
| S1105 | GSSNSDSDLFSRL |   |   |   |
| S1109 | SDSDLFSRLAQIL |   |   |   |
| T1163 | SSSLPRTSSSSPS |   |   |   |
| S1080 | PHHDQRSSSPHLG |   |   |   |
| S1081 | HHDQRSSSPHLGR |   |   |   |
| S1182 | HDQRSSSPHLGRS |   |   |   |
| S1240 | GKSKPASKLSRAA |   |   |   |
| S1243 | KPASKLSRAAAAA |   |   |   |

|                                  |
|----------------------------------|
| Motif-X motif<br>xxxxxxS/TxxExxx |
| QSVSLGSSVESGR                    |
| TKGLLSIYEDKT                     |
| SEPAKASEKEAPE                    |
| DAGEEGSRREEAA                    |
| KEQSLSLRERLQ                     |
| ELERLCSSLEAKH                    |
| QLQKHFSLEAEA                     |
| EGVALRSAKEFLV                    |
| WRHELASAQEVAK                    |
| LNQLESSLWEEAS                    |
| SRLGYMSASEQLR                    |
| DSGLTGSQSEFQK                    |
| LEKELQSSSEQNT                    |
| ECRNFRSQAIEKAQ                   |
| KELGDVSAREDRG                    |
| KEAEKASSQEVAA                    |
| LLLEKNSLTEQNK                    |
| KLTLSSSELEQRA                    |
| SRLRSPSVLEVRE                    |
| LEELTASLFEEAH                    |
| IRFVKASAVECGG                    |
| DKEQVGSIKERYD                    |

|               |
|---------------|
| PTVELYSPRENFS |
| KSILLESDNEDEK |
| ELFHCVSENEHGA |
| LAQEIDSTLESSS |
| ESSSPVSAKEKLL |

|                               |
|-------------------------------|
| MODL motif<br>xxxxxxS/TxxExxx |
|                               |
| QSVSLGSSVESGR                 |
| TKGLLGSIYEDKT                 |
| SEPAKASEKEAPE                 |
| DAGEEGSRREEAA                 |
| PPRSLATEEPPQ                  |
| KEQSLSSLRERLQ                 |
| ELERLCSSLEAKH                 |
| QLQKHFSLEAEA                  |
| EGVALRSAKEFLV                 |
| WRHELASAQEVAK                 |
| LNQLESSLWEEAS                 |
| SRLGYMSASEQLR                 |
| DSGLTGSQSEFQK                 |
| LEKELQSSSEQNT                 |
| ECRNFRSQAEKAQ                 |
| QLEAEKTLEEKQI                 |
| KELGDVSAREDRG                 |
| KEAEKASSQEVAA                 |
| KDELNATLKEEMR                 |
| LLLEKNSLTEQNK                 |
| QKNAMITVLENTI                 |
| KLTLSSSELEQRA                 |
| SRLRSPSVLEVRE                 |
| LEELTASLFEEAH                 |
| IRFVKASAVECGG                 |
| DKEQVGSIKERYD                 |
| TDKFLETCLKMQ                  |
| PTVELYSPRENFS                 |
| KSILLESDNEDEK                 |
| ELFHCVSENEHGA                 |
| LAQEIDSTLESSS                 |
| ESSSPVSAKEKLL                 |

|                               |
|-------------------------------|
| MODL motif<br>xxxxxxS/TLxxxxx |
|                               |
| CDEHYRSLVIQER                 |
| RDPPKSSLALGSS                 |
| SLALGSSLAPVHV                 |
| RGSQSVSLGSSVE                 |
| DFEYEESLRTSQP                 |
| EEKKDVSLSDAA                  |
| RAEQEASLQKLRE                 |
| RKEAVATLEKEHS                 |
| LERLCSSLEAKHR                 |
| HREVVSSLQKKIQ                 |
| YEHELSSLLREKR                 |
| LQKHFSLEAEAQ                  |
| TKEVSSLSQSKE                  |
| EDLYLDSLSSHNV                 |
| IHGLSHSLRQISS                 |
| KPKATLSLLQLGL                 |
| HKANYQTLKAEHT                 |
| MQATVRSLEAEKQ                 |
| QHQRSLLRKRL                   |
| LNNMNQSLTLELN                 |

|               |
|---------------|
| AKSHKLTLSEL   |
| RRRMKKSLSAPLH |
| AQPEVKTAVDQV  |
| CKEADLSLYNEFR |
| SHRSHSLASSLR  |
| HHSASSLRSHHT  |
| TFTISTTLRGRQ  |
| PDKLPGSLGHPRP |
| HCIEISSLPGLV  |
| AQEIDSTLESSP  |

| List of plasmids     |                                                                                                                                                                                                                                   |
|----------------------|-----------------------------------------------------------------------------------------------------------------------------------------------------------------------------------------------------------------------------------|
| Plasmid              | source                                                                                                                                                                                                                            |
| Myc-CEP164           | Cajane et al., 2014                                                                                                                                                                                                               |
| GFP-CEP164           | Cajane et al., 2014                                                                                                                                                                                                               |
| FLAG CEP164 N-term   | Cajane et al., 2014                                                                                                                                                                                                               |
| FLAG-CEP164-M part   | Cajane et al., 2014                                                                                                                                                                                                               |
| FLAG-CEP164-C-term   | Cajane et al., 2014                                                                                                                                                                                                               |
| FLAG-CEP164 N term   | Cajane et al., 2014                                                                                                                                                                                                               |
| FLAG-CEP164 N-A term | Site directed mutagenesis of FLAG-CEP164 N term                                                                                                                                                                                   |
| Myc-CEP83            | cDNA from Kim Joon (Joo et al, 2013, PNAS), cloned using gateway system into pDEST-MYC                                                                                                                                            |
| FLAG-CEP83           | cDNA from Kim Joon (Joo et al, 2013, PNAS), cloned using gateway system into pDEST-FLAG                                                                                                                                           |
| GFP-CEP83            | cDNA from Kim Joon (Joo et al, 2013, PNAS), cloned using gateway system into pGLAP1                                                                                                                                               |
| Myc-CEP89            | Cajane et al., 2014                                                                                                                                                                                                               |
| FLAG-CEP89           | Cajane et al., 2014                                                                                                                                                                                                               |
| GFP-CEP89            | Cajane et al., 2014                                                                                                                                                                                                               |
| HA-CP110             | CCSB human ORFeome collection,<br><a href="http://horfdb.dfci.harvard.edu/hv5/index.php?page=getresults&amp;by=detail&amp;qury=1945">http://horfdb.dfci.harvard.edu/hv5/index.php?page=getresults&amp;by=detail&amp;qury=1945</a> |
| GFP-Rab8a            | gift from G. Pereira (Schmidt et al, JBC, 2012)                                                                                                                                                                                   |
| GFP-Rabin8           | gift from G. Pereira (Schmidt et al, JBC, 2012)                                                                                                                                                                                   |
| FLAG-Rabin8          | cDNA from G. Pereira, cloned into pDEST-FLAG                                                                                                                                                                                      |
| GFP-CCDC92           | cDNA from RPE-1 cells, cloned using gateway into pglap1                                                                                                                                                                           |



|                         |                                                                                    |
|-------------------------|------------------------------------------------------------------------------------|
| FLAG-CCDC92             | cDNA from RPE-1 cells, cloned using gateway into pDEST-FLAG                        |
| GFP-DVL2                | Gift from R. Lefkowitz (Chen et al., Science 2003), additional reference (2)       |
| FLAG-DVL3               | Gift from S.Angers (Angers et al., Nat Cell Biol. 2006 ), additional reference (3) |
| FLAG-TTBK2 WT           | Cajanek et al., 2014                                                               |
| FLAG-TTBK2 KD           | Cajanek et al., 2014                                                               |
| GFP-TTBK2 WT            | Cajanek et al., 2014                                                               |
| Myc-TTBK2               | Cajanek et al., 2014                                                               |
| pDEST-MYC               | gift from E. Nigg (Arquint et al, JCS, 2012), additional reference (4)             |
| pDEST-FLAG              | gift from E. Nigg (Arquint et al, JCS, 2012), additional reference (4)             |
| pgLAP1                  | pgLAP1 was a gift from Peter Jackson, addgene plasmid #19702                       |
| pgLAP2 NEO              | Cloned from pgLAP2, hygromycin resistance replaced by G418 resistance cassette     |
| pgLAP2 NEO TTBK2 WT     | cloned using gateway cloning system                                                |
| pgLAP2 NEO TTBK2 KD     | cloned using gateway cloning system                                                |
| pOG44                   | V6005-20, Thermo Fisher Scientific                                                 |
| pSPCas9 BB GFP          | <a href="https://www.addgene.org/48138/">https://www.addgene.org/48138/</a>        |
| pgLAP2 NEO CEP164 FL WT | cloned using gateway cloning system                                                |
| pgLAP2 NEO CEP164 FL-A  | Site directed mutagenesis of CEP164 WT                                             |

| List of antibodies |              |                                                                             |                   |                   |                                               |
|--------------------|--------------|-----------------------------------------------------------------------------|-------------------|-------------------|-----------------------------------------------|
| Name               | Cat.no       | Manufacturer                                                                | WB                | IF                | IP                                            |
| FLAG M2            | F1804, A2220 | Sigma-Aldrich, Merck                                                        | 1:1000<br>(F1804) | 1:1000<br>(F1804) | 20 µl (slurry) of adsorbed beads/dish (A2220) |
| Myc 9E10           | M4439        | Sigma-Aldrich, Merck                                                        | 1:500             |                   |                                               |
| GFP                | ab290        | Abcam                                                                       | 1:500             |                   |                                               |
| TTBK2              | HPA018113    | Sigma-Aldrich, Merck                                                        | 1:500             | 1:500             |                                               |
| Arl13b             | 17711        | Proteintech                                                                 |                   | 1:1000            |                                               |
| CAP350             |              | Gift of Erich A. Nigg<br>(Yan et al.,2006 MboC)<br>Additional reference (1) |                   | 1:1000            |                                               |
| HA                 | 66006-1-Ig   | Proteintech                                                                 |                   | 1:1000            |                                               |
| CEP164             | 22227-1-ap   | Proteintech                                                                 | 1:1000            | 1:1000            | 2ul/ 15 cm dish                               |
| IFT88              | 13967-1-AP   | Proteintech                                                                 |                   | 1:500             |                                               |
| CEP83              | HPA038161    | Sigma-Aldrich, Merck                                                        | 1:1000            | 1:1000            |                                               |
| CEP89              | HPA 040056   | Sigma-Aldrich, Merck                                                        | 1:1000            |                   |                                               |
| CEP97              | 22050-1-ap   | Proteintech                                                                 | 1:1000            |                   |                                               |
| γ-tubulin          | T6557        | Sigma-Aldrich, Merck                                                        |                   | 1:1000            |                                               |
| α-tubulin          | 11224-1-ap   | Proteintech                                                                 | 1:1000            |                   |                                               |

|                 |      |                      |        |  |  |
|-----------------|------|----------------------|--------|--|--|
| HRP-anti mouse  | 4416 | Sigma-Aldrich, Merck | 1:4000 |  |  |
| HRP-anti rabbit | 7074 | CST                  | 1:4000 |  |  |
|                 |      |                      |        |  |  |

|                                       |        |                                         |  |        |  |
|---------------------------------------|--------|-----------------------------------------|--|--------|--|
| Donkey anti-mouse<br>Alexa fluor 488  | A21202 | Invitrogene,<br>ThermoFisher scientific |  | 1:2000 |  |
| Donkey anti-rabbit<br>Alexa fluor 488 | A21206 | Invitrogene,<br>ThermoFisher scientific |  | 1:2000 |  |
| Donkey anti-mouse<br>Alexa fluor 568  | A10037 | Invitrogene,<br>ThermoFisher scientific |  | 1:2000 |  |
| Donkey anti-rabbit<br>Alexa fluor 568 | A10042 | Invitrogene,<br>ThermoFisher scientific |  | 1:2000 |  |
| Donkey anti-goat<br>Alexa fluor 647   | A32849 | Invitrogene,<br>ThermoFisher scientific |  | 1:2000 |  |
